1 **Multimodal and multisensory coding in the *Drosophila* larval peripheral**  
2 **gustatory center**

3

4

5 G. Larisa Maier<sup>1</sup>, Marjan Biočanin<sup>2</sup>, Johannes Bues<sup>2</sup>, Felix Meyenhofer<sup>1</sup>, Clarisse Brunet  
6 Avalos<sup>1</sup>, Jae Young Kwon<sup>3,4</sup>, Bart Deplancke<sup>2,4</sup> and Simon G. Sprecher<sup>1,4,5</sup>

7

8 <sup>1</sup>Department of Biology, University of Fribourg, 1700 Fribourg, Switzerland

9 <sup>2</sup>Laboratory of Systems Biology and Genetics, Institute of Bioengineering, School of Life  
10 Sciences, EPFL and Swiss Institute of Bioinformatics (SIB), 1015 Lausanne, Switzerland

11 <sup>3</sup> Department of Biological Sciences, Sungkyunkwan University, Suwon 16419, Republic of  
12 Korea

13

14 <sup>4</sup> J.Y.K., B.D. and S.G.S. are co-senior authors.

15 <sup>5</sup> To whom correspondence should be addressed. Email: [simon.sprecher@unifr.ch](mailto:simon.sprecher@unifr.ch)

16 **Abstract**

17

18 The ability to evaluate food palatability is innate in all animals, ensuring their survival. The  
19 external taste organ in *Drosophila* larvae is composed of only few sensory neurons but  
20 enables discrimination between a wide range of chemicals and displays high complexity in  
21 receptor gene expression and physiological response profile. It remains largely unknown how  
22 the discrepancy between a small neuronal number and the perception of a large sensory space  
23 is genetically and physiologically resolved. We tackled dissection of taste sensory coding at  
24 organ level with cellular resolution in the fruit fly larva by combining whole-organ calcium  
25 imaging and single-cell transcriptomics to map physiological properties and molecular  
26 features of individual neurons. About one third of gustatory sense neurons responded to  
27 multiple tastants, showing a rather large degree of multimodality within the taste organ.  
28 Further supporting the notion of signal integration at the periphery, we observed neuronal  
29 deactivation events within simultaneous neighboring responses, suggesting inter-cellular  
30 communication through electrical coupling and thus providing an additional level in how  
31 neurons may encode taste sensing. Interestingly, we identified neurons responding to both  
32 mechanical and taste stimulation, indicating potential multisensory integration. On a  
33 molecular level, chemosensory cells show heterogeneity in neuromodulator expression. In  
34 addition to a broad cholinergic profile, markers on dopaminergic, glutamatergic or  
35 neuropeptidergic pathways are present either in distinct cell populations or are seemingly co-  
36 expressed. Our data further extend the sensory capacity of the larval taste system pointing  
37 towards an unanticipated degree of multimodal and multisensory coding principles.

38

## 39 **Introduction**

40

41 Taste sensing provides the innate ability in all animals to avoid toxic or deleterious food  
42 ingestion and to choose a nutritious diet. The fruit fly larva is able to discriminate between a  
43 large range of different gustatory cues (1), being – similarly to humans – repelled by bitter  
44 tastants (2-4) as possible signals of toxic food, and attracted by sweet and certain amino acids  
45 (5-7), indicators of a nutritious diet. Distinct from mammals where hundreds of taste cells are  
46 assembled in taste buds on the tongue, the larva disposes of very few gustatory sense neurons  
47 (GSNs) at the periphery (8, 9), raising the question of how does a small neuronal population  
48 encode a large palette of cues.

49 Distinct models of sensory coding have emerged for taste perception. According to the  
50 labeled-line model, each cell within a mammalian taste bud is tuned to one of the 5 basic  
51 tastes – sweet, umami, bitter, sour and salt (10-13). This model relies to a large extent on the  
52 existence of a best stimulus concentration (14) but varying the concentration of a given tastant  
53 alters the number of responding cells and afferent sensory neurons, often increasing the  
54 proportion of multituned neurons (15). Moreover, taste cells within a bud have been shown to  
55 communicate with each other through purinergic signaling (16), entailing coexistence of  
56 narrowly and broadly tuned taste sensing cells (17) and signal integration at the periphery,  
57 distinct from a strictly segregated taste sensing model.

58 In *Drosophila* taste sensing has been described in accordance with a labeled-line model, as  
59 sweet, bitter and water perception localize in separate populations of peripheral GSNs (18-  
60 22). However, additional tastes such as salt, fatty acid, carbonation, polyamines or amino  
61 acids partially overlap onto sweet or bitter sensing GSNs by means of specific added-on

62 receptor expression (23-30), suggesting a model of taste sensing with both narrowly and more  
63 broadly tuned cells, similar to mammals.

64 The peripheral gustatory system in the *Drosophila* larva presents many similarities with the  
65 adult fly, such as the sensillar organization of dendrites, presence of both internal and external  
66 chemosensory organs (31), as well as cue detection through the same chemoreceptor gene  
67 families – GRs (Gustatory Receptors), IR (Ionotropic Receptors), PPKs (pickpocket) or TRPs  
68 (Transient Receptor Potential) (29, 32-38). On the other hand, larval taste processing presents  
69 developmental stage particularities, considering that the number of GSNs is much lower than  
70 in adult flies and many receptors are larva-specific (39, 40).

71 The main chemosensory organs in *Drosophila* larva are located at the tip of the head,  
72 represented by ganglia of bipolar sensory neurons (Fig.1A) (41). External organs include the  
73 terminal organ ganglion (TOG) – with main taste, but also mechano- and thermo-sensory  
74 function, the dorsal organ ganglion (DOG) – with primary olfactory role, and the smaller,  
75 generally uncharacterized ventral organ ganglion (VOG) – with associated taste function (8).  
76 Sensory neurons in these ganglia extend dendrites to the periphery in direct contact with the  
77 environment and axonal projections into defined regions of the brain. Conversely, internal  
78 chemosensory organs called ventral, dorsal and respectively posterior pharyngeal sensories  
79 (VPS, DPS, PPS) are located on the pharyngeal tube where they project their dendrites (42),  
80 therefore functionally associated with taste sensing during food ingestion.

81 Thanks to the 1 to 1 receptor to neuron expression in the DOG, functional dissection of the 21  
82 olfactory sensory neurons was achieved using corresponding Gal4 lines (43-47). In contrast,  
83 the neighboring TOG, main external larval taste center, comprises more than 30 GSNs out of  
84 which only 7 neuronal identities (C1-C7) have been mapped and can be traced using  
85 individual Gal4 lines (Fig.1B) (39, 48, 49). Characterization of single larval GSNs has

86 revealed multimodality and even taste integration of opposed valence within one GSN (48),  
87 but the general taste sensing logic in this animal remains largely unexplored.

88 We here delve into sensory tuning diversity of TOG neurons by using whole-organ in-vivo  
89 calcium imaging recordings on larvae expressing genetically encoded calcium sensors. To  
90 gain insight into molecular components of TOG and DOG neurons we employed DisCo, a  
91 novel approach that enables single-cell RNA sequencing of low input samples (50). Our  
92 findings provide insights into fundamental aspects of taste sensory coding. First, we show that  
93 roughly one third of responding GSNs are activated by more than one taste modality, while  
94 conversely, single tastants generally elicit responses in several neurons. Interestingly, we  
95 detected neuronal deactivation responses, distinct from canonical calcium imaging signals,  
96 which occurred within concomitant firing in adjacent neurons, as described for electrical  
97 coupling in the adult fly olfactory system (51, 52). Using DisCo and immunostainings, we  
98 identified distinct and common molecular markers in TOG/DOG neurons. While it was  
99 known that larval chemosensory neurons are cholinergic (53), we found that they are also  
100 glutamatergic and dopaminergic, and, similar to the central nervous system (CNS) (54),  
101 neurons may also co-express neurotransmitter markers. Lastly, we detected expression of  
102 mechanosensory receptor genes and, intriguingly, GCAMP recordings showed activation to  
103 both mechanical and chemical stimulation in some neurons, implying multisensory  
104 integration at single cell level. Taken together, our observations of the larval external  
105 gustatory organ bring evidence of multimodality, possibly inter-cellular communication  
106 through electric coupling, heterogeneous expression of neurotransmitter markers and  
107 mechanosensory features in GSNs.

## 108 **Results**

109

### 110 **Whole organ larval taste recordings with single cell resolution**

111

112 Due to the sparse availability of Gal4 lines for individual GSN labeling in the larva, assessing  
113 an overview of peripheral taste coding by tackling single neurons entails limitations. We  
114 therefore undertook characterization of TOG neurons by means of a whole-organ approach.

115 First, we performed immunostainings on individual GSNs expressing *myr:GFP* (Fig.1C & D).  
116 Structural flexibility of this tissue entails variability across samples but we noted the 7  
117 previously identified GSNs maintained a relatively stereotypical localization between  
118 stainings ( $n \geq 3$ ) (Fig1C). This allowed assembling 3D locations of the 7 GSNs, serving as  
119 approximation map of their respective position within the organ (Fig.1D).

120 Further, we performed whole-organ calcium imaging recordings by expressing cytoplasmic  
121 GCaMP6m (55) and nuclear RFP (56) reporters in all neurons driven by *nSyb-Gal4* (Fig.1E).  
122 The use of a nuclear reporter as cellular landmark was critical for whole organ recordings, as  
123 solely a cytoplasmic fluorophore would not sufficient for efficient segmentation due to low  
124 baseline fluorescence intensity in some cells and to ambiguous delimitation between  
125 neighboring somata. As previously described (57), we made use of a customized microfluidic  
126 chamber for chemical stimulation while recording physiological responses of all GSNs in a  
127 semi-intact larval preparation, and we subsequently developed a data processing pipeline for  
128 whole organ recordings (Suppl.Fig.1).

129

### 130 **One third of responding GSNs show taste multimodality**

131 We first tested two distinct series of chemicals each containing 5 substances belonging to the  
132 5 canonical taste categories: sweet, bitter, sour, amino acids and salt. Substances and  
133 concentrations were chosen according to former studies (48, 58) (Table1, Fig.2A, see  
134 Methods). Out of all responding neurons across 15 total recorded organs, 66% showed  
135 activation to only one tastant per animal and most unimodal responses were recorded to  
136 sucrose and high salt (Fig.2A, uni-taste/cell). In line with our previous findings that some  
137 GSNs are multimodal (48), the remaining 34% of responding neurons were activated by more  
138 than one substance (Fig.2A, Suppl.File1), showing that several larval GSNs have the capacity  
139 to respond to different taste categories. The top 5 taste response combinations mapping to one  
140 neuron (Fig.2A, multi-taste/cell) were: sucrose and valine/arginine (sweet + amino acid,  
141 17%), sucrose and citric acid (sweet + sour, 17%), citric acid and high salt (sour + high salt,  
142 14%), sucrose and high salt (sweet + high salt, 14%) and finally sucrose and  
143 denatonium/quinine (sweet + bitter, 14%). Interestingly, sucrose was the tastant  
144 corresponding to most uni-taste/cell responses but also to most frequent taste combinations of  
145 multi-taste/cell.

146 Next, we expanded the number of gustatory cues used for GSN stimulation by using groups of  
147 tastants for sweet, bitter, amino acid and salt taste categories (Fig.2B, Suppl.Table 1). To  
148 begin with, we tested 2 groups of sugars, chosen as monosaccharides (fructose, glucose,  
149 arabinose, mannose, galactose), and respectively disaccharides (sucrose, trehalose, maltose,  
150 lactose, cellobiose). We calculated a rounded 74% of sugar-responsive neurons to be activated  
151 by either monosaccharides (41%) or disaccharides (33%), and a rounded 25% by both groups  
152 (Fig.2B, upper left panel).

153 For salt taste stimulation we mixed NaCl and KCl for a final concentration of 50mM for low  
154 salt group and respectively 1M for high salt group. We observed a low percentage of cell

155 activation overlap among salt-responding cells, 20% being activated by both groups while the  
156 rest responded either to high salt (56%) or to low salt (24%).

157 The 20 proteinogenic amino acids were compiled in 4 groups (A, B, C and D) as previously  
158 described by Park et al. (59) (Suppl.Table 1). 38% amino acid-responding neurons showed  
159 activation to 2 or more amino acid groups. Similar percentages were observed for animals  
160 stimulated with all 8 groups (2 sugar, 2 salt and 4 amino acid units), with up to 40% neurons  
161 responding to at least 2 different taste modality groups (Fig.2B upper right panel).

162 Bitter tastants were randomized in 2 groups of 4 substances each (Suppl.Table 1): DSoTC  
163 group (denatonium benzoate, sucrose octaacetate, theophylline, coumarin), and respectively  
164 QLSC group (quinine, lobeline, strychnine, caffeine). Among cells responsive to bitter  
165 stimulation we observed a bigger fraction of cells activated by DSoTC group (55%) than by  
166 QLSC (30%). In animals tested for sweet and bitter taste response, the percentage of cells  
167 activated by both sugar and bitter groups was of 30% (Fig.2B, lower panels), in agreement  
168 with cell integration of tastants with opposite valence.

169

## 170 **Taste stimulation can elicit either activation or deactivation signals in GSNs**

171 While canonical responses of GSNs to taste cues entail a rise of GCaMP fluorescence, we  
172 also detected neuronal responses characterized by a fluorescence intensity decrease. For  
173 simplicity, and not as conclusive categorization, we named these observed intensity  
174 fluorescence decrease signals: *deactivation responses*, as they are seemingly opposite to  
175 canonical neuronal activation measured through fluorescence increase.

176 A notable example of deactivation was recorded in response to citric acid in 2 neurons  
177 localized centrally in the organ in close proximity with each other. We termed these neurons



178 CDL1 (central-dorsal-lateral neuron 1) and CDL2, respectively. Intriguingly, CDL1 and  
179 CDL2 responded to citric acid in a pattern of synchronous activation-deactivation (Fig.3A).

180 To examine into the possibility that deactivation responses were caused by top-down  
181 inhibition by central interneurons, we performed recordings in animals with severed  
182 connections between chemosensory neurons and CNS (Fig.3B). Detaching the brain and the  
183 respective sensory nerve connections did not abolish the activation-deactivation responses  
184 induced by citric acid stimulation. Likely, this pattern corresponds to ephaptic transmission  
185 where the electrical field of a responding cell generates hyperpolarization in the partner cell  
186 (60), also reported in the adult olfactory system (51).

187

### 188 **Mapping neuronal responses across larvae shows a high level of taste multimodality**

189 Next, we proceeded to match neurons based on their spatial position within the TOG organ  
190 and responses recorded to individual taste series presented in figure 2A. We identified and  
191 named 21 GSNs (Fig.4, y axis and 3D image). All considered responses exceeded 20% DF/F0  
192 and were manually validated. Not all neurons showed the same response consistency, as  
193 reflected by the stereotypy of response, meaning the percentage of times a neuron was  
194 identified to respond (Fig.4A freq, grey tones with darker color denoting higher frequency).  
195 Heatmap for activation and deactivation responses for each neuron were compiled separately  
196 and for each cell and each tastant, we plotted the stereotypy of response next to the average  
197 intensity of response (Fig.4A, x axis). Average intensities were considered only if response  
198 frequencies were at least 20% for the given tastant.

199 Although deactivation responses were noted to different substances in different neurons  
200 (Fig.4A, blue ovals), such events with frequency of response above 20% were only mapped to  
201 CDL2 and CPV neurons, particularly for citric acid stimulation. Noteworthy, CDL1 was

202 robustly activated by citric acid while its CDL2 neighbor showed robust deactivation in  
203 response to citric acid (Suppl.File2, Wilcoxon signed rank nonparametric test,  $p < 0.05$ )  
204 (Fig.4C), as described for their concomitant response pattern in figure 3.

205 While most GSN identities cannot be pinned down with absolute certainty, we identified the  
206 AC1 neuron to likely share identity with the previously described C6 neuron, based on the  
207 easily recognizable anterior position in the organ (Fig.1C & 4B) and response profiles to  
208 sucrose and high salt as previously reported for C6 (48) (Fig.4D).

209 Taken together, the physiological results show an important degree of taste integration and  
210 complexity – a tastant can elicit responses from multiple GSNs and a GSN can respond to  
211 multiple tastants per animal or across animals, suggesting a combinatorial mode of sensory  
212 encoding.

213

#### 214 **Molecular profiles of TOG and DOG neurons at single cell resolution**

215

216 In order to assess molecular features of individual sense neurons we performed single cell  
217 transcriptomic experiments on the TOG and the DOG. Due to low neuronal number and to  
218 restricted access to the tissue, the choice of methodology was a limiting and important factor.

219 To generate single cells in suspension at the level of sense organs we proceeded with their  
220 isolation by manual picking (Fig.5A) and importantly, we employed a deterministic DropSeq  
221 approach for low cell numbers (50, 61), resulting in increased efficiency of encapsulation  
222 compared to classical approaches (62, 63).

223 The single cell data was analyzed in Seurat v3.1.2 (64, 65) (Suppl.Fig.5B, see Methods),  
224 obtaining a dataset of 153 cells with more than 400 genes per cell. We used UMAP

225 embedding for visualization of marker gene expression (Suppl.Fig5C) and confirmed  
226 neuronal identity of the relatively homogenous cell population based on neuronal gene  
227 markers (Fig.5B). Moreover, we could detect distinct and non-overlapping expression of  
228 marker genes for gustatory and olfactory sensory cells. Specifically, the *Orco* gene (*Odorant*  
229 *receptor co-receptor*) that is present in all olfactory neurons in the DOG (43), most probably  
230 labels the olfactory neuronal population. Conversely, *proboscipedia* (*pb*), a gene known to  
231 mediate specification of adult mouthparts (66), shows no overlap of expression with *Orco*-  
232 positive cells, labeling a distinct neuronal population (Fig.5C, left). Importantly,  
233 immunofluorescence staining in embryos shows *pb* expression restricted to TOG neurons and  
234 non-overlapping with *Orco* (Fig.5C, right). Furthermore, expression of the two marker genes  
235 largely correlated with the two generated clusters, although less defined for *Orco*, which  
236 shows a more dispersed cell expression pattern (Suppl.Fig5C).

237

### 238 **Chemosensory neurons display broad and narrow expression of neurotransmitter** 239 **markers**

240 To further explore molecular neurotransmitter profiles of sense neurons we performed  
241 immunostainings of marker genes on distinct neuromodulator pathways. Using *Cha*-Gal4  
242 (67), we found *Choline acetyltransferase* (*ChAT/Cha*) in virtually all sense neurons in  
243 immunofluorescence staining (Fig.6A, left), corresponding to a relatively broad molecular  
244 expression (Fig.6A, right). Conversely, we identified *pale* (*ple*) as being expressed in 2 cells  
245 of the TOG as shown by TH antibody staining (Fig.6B, left), and corresponding to a cell  
246 group identified in the UMAP embedding colored by expression (Fig.6B, right). *Pale* encodes  
247 a tyrosine hydroxylase as the first step on dopamine synthesis pathway and is orthologous to  
248 human *tyrosine hydroxylase* (*TH*).

249 Other neurotransmitter markers have also shown selective molecular expression, as in the  
250 case of *Vesicular glutamate transporter (VGlut)*. Immunofluorescence on *VGlut*-Gal4 larvae  
251 exposes three cells – one in the TOG, one in the DOG and a third cell in a group peripheral to  
252 TOG, we named here Mec (Fig.6C). We verified the response profile of these neurons by  
253 recording their physiological response to tastants introduced earlier (Fig.2A), and we  
254 compared the response for each tastant with the water response. We noted sucrose responses  
255 to be different than control in the TOG and the DOG neurons (Fig.6D, Suppl.File3,  $p < 0.05$ ,  
256 Mann-Whitney test), whereas Mec cell didn't show responses distinct from water to any of  
257 the tested substances. The TOG *VGlut*-positive cell did not show co-expression with C7, C2  
258 or C1-Gal4 (Suppl.Fig6), its identity remaining to be determined.

259 We have detected co-expression of markers on shared neuromodulatory pathway, as in the  
260 case of *Dopamine transporter (DAT)* and *Vesicular monoamine transporter (Vmat)* (Fig.7A).  
261 Considering that *Cha* is expressed in all chemosensory neurons according to  
262 immunofluorescence observations (Fig.6A), co-expression could be theoretically deduced  
263 between this and any other neurotransmitter revealed by the molecular data. Specifically, we  
264 have detected *Cha* and *DAT* co-localization in a small subset of cells as illustrated in Fig.7B.  
265 Additionally, we have identified several neurotransmitter receptors linked to GABA,  
266 serotonin, octopamine or dopamine signaling pathways, some of them showing co-expression  
267 in certain neurons, as for example *GABA-B-R2* and the serotonergic receptor *5-HT2B*  
268 (Fig.7C). Moreover, neuropeptide expression was also abundant in our data, such as  
269 neuropeptide-like 2/4 precursors (*Nplp2*, *Nplp4*), also co-expressed with other  
270 neurotransmitter markers such as *VGlut* or *Vmat* (Fig.7D & E). Co-expression of several  
271 neuromodulators in numerically restricted neuronal tissues such as the TOG and DOG  
272 supports the multimodal character of these sense organs but the functional implication of this  
273 observation remains an open question.

274

## 275 **GSNs show mechanosensory marker expression and responses**

276 Mechanosensory function in the larval taste sensing was assumed to a large extent due to  
277 early microscopic descriptions of chemosensory organs in *Drosophila* and in other insects (9,  
278 68, 69). Although functional investigations of mechanical and chemosensory integration have  
279 been explored in the adult fly (70, 71), similar studies in the larva were primarily focused on  
280 food texture effects in taste behavior and learning (72, 73) while the involved  
281 mechanoreceptors remain unknown. We identified expression of mechanosensory markers  
282 both by means of immunofluorescence stainings and in single cell UMAP embedding (Fig.8).  
283 Namely, *nanchung* (*nan*) is expressed in one TOG and one DOG cell (Fig.8A), whereas *no*  
284 *mechanoreceptor potential C* (*nompC*) is present in a group of 3-4 cells of the TOG and  
285 surrounding smaller sensilla (Fig.8B). We found expression of *painless* (*pain-Gal4*) by means  
286 of immunolabelling in a population of up to 12 TOG cells, corresponding to a few single cells  
287 in the UMAP embedding. Knowing that *pain* is involved in mechanical and thermal  
288 nociception in multidendritic and chordotonal sensory neurons in the larva (74), we further  
289 tested the response profiles in *pain*-expressing TOG neurons to mechanical stimulation  
290 (Fig.8C).

291 To measure mechanical responses we aimed at inducing fluid shear stress on the cellular  
292 membrane (75) and measuring the cell response after turning on the water flow inside the  
293 microfluidic chip. As the tissue was exposed to water also during the off stimulus (in absence  
294 of flow), we interpreted neuronal responses to be determined by the fluid flow and not by  
295 water taste itself. We detected fluorescence intensity changes on average in 4 *pain-Gal4* cells,  
296 which were named based on their relative position and mapped to the organ. More often than

297 not, although not exclusively, we observed fluorescence intensity decrease during the on  
298 stimulus, *pain*-expressing cells being potentially de-activated by shear stress (Fig.8C).

299 In a separate assay we recorded *nsyb*-Gal4 larvae for mechanosensory as well as taste sensing.  
300 Interestingly, in few cases we observed neurons activated by both types of modalities, as for  
301 example CM1 neuron responding to 500mM sucrose but also showing de-activation to  
302 mechanical shear stress (Suppl.Fig8). This observation suggests that some GSNs could  
303 integrate both mechano- and taste sensing as previously suggested (8).

304

## 305 **Discussion**

306

307 In this study we explored the physiological and molecular characteristics of *Drosophila* larval  
308 taste system. We designed an experimental framework allowing calcium imaging in all GSNs  
309 comprised by the larval primary taste-sensing organ at the periphery (the TOG, Fig.1,  
310 Suppl.Fig.1). Our approach complements previous strategies based on labeling of few single  
311 neurons or subpopulations (6, 29, 35, 39, 48), allowing for an overview of activation patterns  
312 within the organ. Strengthening our previous observations on the multimodal character of  
313 larval taste neurons (48), we identified single GSNs activated by different taste categories as  
314 well as single GSNs activated by tastants with opposite associated valence. Cell integration of  
315 different tastes might involve spatio-temporal codes, as described for gustatory discrimination  
316 in the moth (76) or combined patterns of response in cell number and type of activation. In  
317 line with our observations that one tastant elicits response in several GSNs, it is interesting to  
318 consider that the relevance of a stimulus and ultimately its behavioral output could depend on  
319 neurons firing together, concurrent activation of 2 neurons differing from their separate  
320 activation (77).

321 For the substances tested within this study we observed roughly a 60-70% versus 30-40%  
322 division of uni-modal versus multi-modal responding GSNs (Fig.2 & 4), comparable with  
323 tuning proportions reported for mouse fungiform taste sensing cells (78). The *best stimulus*  
324 *concentration* principle is arguably the strongest support of the labeled-line taste coding at the  
325 periphery in the mammalian system (79). However, this model leaves out the case of tastants  
326 activating different types of taste receptors depending on concentration as in the case of  
327 acesulfame K and saccharin, which at low concentrations activate sweet receptors but with  
328 increased concentration start activating bitter receptors (12). Accordingly, the chosen

329 substance concentrations within our assay might cause variability in response profiles, and  
330 doubtlessly, modifying the dilution for the same tastants would alter the observed tuning of  
331 GSNs, as shown on afferent taste neurons in mammals (15).

332 An intriguing aspect of taste physiology revealed by our observations was GCaMP  
333 fluorescence decrease in GSNs, termed here *deactivation* for ease of discussion. Most notable  
334 deactivation signals were recorded in CDL2 neuron and most stereotypically to citric acid  
335 (Fig.3 & 4), although the phenomenon was not restricted to this neuron or tastant.  
336 Interestingly, citric acid elicited concomitant activation in the neighboring cell named CDL1,  
337 indicating response patterns of activation-deactivation in the CDL1-CDL2 couple, similar to  
338 ephaptic signaling identified in the olfactory system of the adult fly (51). The synchronous  
339 responses were not abolished when severing afferent neuronal axons (Fig.3B), implying that  
340 CDL2 deactivation is not determined by a top-down inhibition from brain interneurons.  
341 Additional possible explanations of the observed neuronal activity include gap junction  
342 communication or tonic activity in CDL2 inhibited by citric acid stimulation, as reported in  
343 sensory neurons of bumblebees and respectively in *C.elegans* (81, 82). However, the observed  
344 synchronous activation coupled with deactivation responses in adjacent neurons best fit the  
345 description of ephaptic signaling (60, 80), pointing towards inter-cellular communication and  
346 thus emphasizing a model of signal integration in larval taste system at the periphery.

347

348 Using DisCo allowed us to successfully probe larval chemosensory organs with single cell  
349 resolution (Fig.5, Suppl.Fig.5), resolving low cell input and tissue accessibility limitations.  
350 We identified *pb* and *Orco* as marker genes distinctly expressed in TOG and respectively in  
351 DOG neurons. If *Orco* is an olfactory co-receptor expressed in all olfactory neurons, taste



352 neuronal population is less characterized and functionally more diverse. Therefore, *pb* could  
353 be an interesting candidate for further characterizing the population of *pb*-expressing GSNs.

354 Moreover, in the present work we describe distinct expression patterns of neuromodulator  
355 marker genes in TOG and DOG neurons, as shown by UMAP embedding and confirmed by  
356 immunostainings (Fig.6). The cholinergic profile of larval chemosensory neurons has  
357 previously been reported (31, 53) but we show that some cells express glutamatergic,  
358 dopaminergic and neuropeptidergic markers. Interestingly, marker genes on different  
359 signaling pathways are co-expressed in subsets of cells (Fig.7), as previously demonstrated in  
360 *Drosophila* CNS (54, 83). Considering the multimodal character of some larval GSNs, it  
361 would be fascinating to uncover the role played by co-expression of distinct neurotransmitter  
362 markers in such neurons. Nevertheless, it remains surprising that a handful of sensory neurons  
363 display a diverse neurotransmitter profile, as reported here, demonstrating a large molecular  
364 diversity within the neuronal sensory population.

365 Furthermore, we found expression of mechanosensory markers as revealed by UMAP  
366 embedding of single-cell data and verified with immunostainings. We detected *nan* in one  
367 TOG neuron and one DOG neuron, whereas *nompC* and *pain* label a larger population. We  
368 recorded responses of *pain*-expressing GSNs exposed to water flow turned on and off, as we  
369 intended to create fluid shear stress on the cell membrane, similarly to observations on  
370 cultured cells (84) and studies on vascular tissue (85). It remains to be elucidated if shear  
371 stress responses detected in *pain* neurons are mediated by Painless channel itself. Painless is a  
372 protein known to be important in mechanical and thermal nociception in larvae (74), although  
373 its role remains unexplored in the gustatory system. On the other hand, Painless has also been  
374 shown to be involved in wasabi taste detection in adult flies in Gr66a-expressing GSNs (86)  
375 and we have also found scarce co-expression between *pain* and *Gr66a* (data not shown). The  
376 presence of mechanosensory neurons in the larval primary taste center has been frequently

377 reported (9, 49). Although chemosensory sensilla have been classically described as distinct  
378 from mechanosensory sensilla (87), existence of neurons with dual chemo- and  
379 mechanosensory modalities has also been implied based on their tubular dendritic body (8). In  
380 our observations, some mechano-responsive neurons also show activation to gustatory cues  
381 (Suppl.Fig.8), stressing on the probability of multisensory integration of taste and mechanical  
382 cues.

383 Taken together, our data suggest a complex taste sensory coding in the larva, made up by  
384 patterns of activity across neurons rather than by labeled individual neuronal responses for  
385 discrimination between tastants. Besides canonical fluorescence increase responses we have  
386 depicted fluorescence decrease signals in specific neurons pointing towards electric coupling  
387 and therefore sensory cue processing at the periphery. Additionally, the neurotransmitter and  
388 mechanoreceptor expression contribute to the multifaceted chemosensory system to  
389 potentially explain the multimodality and multisensory character of specific taste neurons in  
390 future studies.

## 391 **Methods**

392

### 393 **Fly stocks.**

394 We used the following fly strains: *nSyb*-Gal4 (gift from Shanhaz Lone), *UAS-GCaMP6m*  
395 (Bloomington #42748), *UAS-H2B:RFP* (gift from Boris Egger), *GMR57B04*-Gal4 (Bl.  
396 #46355), *Gr94a*-gal4 (Bl. #57686), *Gr21a*-Gal4 (Bl. #23890), *Gr22e*-Gal4 (Bl. #57608),  
397 *Gr66a*-Gal4 (Bl. #57670), *Gr97a*-Gal4 (Bl. #57687), *Gr59e*-Gal4 (Bl. #57655),  
398 *UAS:mcd8:GFP;Or83b:RFP* (gift from Travis Carney), *UAS-myr:GFP* (Bl. #32198), *VGlut*-  
399 Gal4 (Bl. #24635) , *VGAT*-Gal4 (Bl. #58980), *Cha*-Gal4 (kindly gifted by PM Salvaterra),  
400 *nan*-Gal4 (Bl. #24903), *nompC*-Gal4 (Bl. #36361), *pain*-Gal4 (Bl. #27894), FlyFos *Orco*-  
401 GFP (VDRC 318654).

402

### 403 **Immunostainings.**

404 3<sup>rd</sup> instar larvae (4 days after egg laying) were washed and dissected in ice-cold PBS. Tissue  
405 containing chemosensory neurons was fixed in 3,7% formaldehyde for 18-20min at room  
406 temperature. After fixation, incubation in primary antibodies was performed at 4°C overnight,  
407 then in secondary antibodies at 4°C overnight, and finally, in Vectashield antifade medium  
408 (Vector Laboratories) for at least 1h before mounting the samples on microscope slides. After  
409 each step described above, PBST (PBS 0,3% Triton X-100) was employed for three  
410 consecutive plus three 30-minute washes at room temperature.

411 Immunolabelling against Pb (Fig.5C) was performed at embryonic stage. Embryos were  
412 washed in tap water and placed in a plastic mesh in a sampling manifold. (Millipore  
413 XX2702550). First, they were dechorionated in 2.5% sodium hypochlorite (household bleach)

414 for 2 minutes. Embryos were then fixed in a 1:1 solution of n-heptane:PEM buffer with 3.7%  
415 formaldehyde for 20 minutes at room temperature on a rotating wheel. Upon fixation,  
416 embryos were washed with methanol and blocked for 1 hour at room temperature with 5%  
417 normal goat serum in PBST. The samples were incubated with antibodies and mounted as  
418 described above.

419 Confocal images were acquired on a Leica TCS SPE-5 confocal, using the 40x oil immersion  
420 objective for larval staining and the 63X glycerol immersion for embryo staining, at 0.8-1um  
421 slice thickness. Images were assembled using Fiji (88) and Adobe Illustrator.

422 Primary antibodies: chicken anti-GFP (1:1000, Abcam, ab13970), rabbit anti-DsRed (1:1000,  
423 Clontech, No. 632496), rat anti-ELAV (1:30, No. 7E8A10), anti-TH (1:100, Millipore,  
424 ab\_390204), rabbit anti-Pb 1:100 (gift of Thomas Kaufman, Cribbs, 1992 #475). Secondary  
425 antibodies conjugated with Alexa Fluor fluorescent proteins (488, 568, 647) were used in  
426 dilution of 1:200 (Molecular Probes no. A-11008, A-11039, A-21244, A-21247, A-11011).

427

## 428 **Chemicals.**

429 For calcium imaging experiments the highest purity available was chosen for all chemicals  
430 used in this study: L-Alanine (Sigma-Aldrich, 56-41-7), L-Glutamine (Sigma-Aldrich, 56-85-  
431 9), L-Aspartic acid (Sigma-Aldrich, 56-84-8), L-Glutamic acid (Sigma-Aldrich, 56-86-0), L-  
432 Asparagine (Sigma-Aldrich, 70-47-3), L-Proline (Sigma-Aldrich, 147-85-3), L-Tyrosine  
433 (Sigma-Aldrich, 60-17-4), L-Threonine (Sigma-Aldrich, 72-19-5), L-Phenylalanine (Sigma-  
434 Aldrich, 63-91-2), L-Lysine (Sigma-Aldrich, 56-87-1), L-Arginine (Sigma-Aldrich, 74-79-3),  
435 L-Histidine (Sigma-Aldrich, 71-00-1), L-Serine (Sigma-Aldrich, 56-45-1), L-Valine (Sigma-  
436 Aldrich, 72-18-4), L-Cysteine (Sigma-Aldrich, 52-90-4), L-Methionine (Sigma-Aldrich, 63-

437 68-3), L-Leucine (Sigma-Aldrich, 61-90-5), L-Isoleucine (Sigma-Aldrich, 73-32-5), L-  
438 Tryptophan (Sigma-Aldrich, 73-22-3), L-Glycine (Roth, 3187.3), D-Sucrose (Sigma-Aldrich,  
439 57-50-1), D-Glucose (Sigma-Aldrich, 50-99-7), G-Fructose (Fluka, 57-48-7), D-Trehalose  
440 dihydrate (Roth, 9286.1), D-Arabinose (Sigma-Aldrich, 10323-20-3), D-Maltose  
441 monohydrate (Sigma-Aldrich, 6363-53-7), D-Mannose (Sigma-Aldrich, 3458-28-4), D-  
442 Galactose (Roth, 4979.1), D-Cellobiose (Roth, 6840.3), Lactose monohydrate (Roth, 8921.1),  
443 Quinine hemisulfate salt monohydrate (Sigma-Aldrich, 6119-70-6), Denatonium benzoate  
444 (Aldrich, 3734-33-6), Caffeine anhydrous (Fluka, 58-08-2), Coumarin (Sigma-Aldrich, 91-  
445 64-5), Sucrose octaacetate (Aldrich, 126-17-7), Lobeline hydrochloride (Aldrich, 134-63-4),  
446 Theophylline (Sigma-Aldrich, 58-55-9), Strychnine (Roth, 4843.1), Potassium chloride  
447 (Merck, 7447-40-7), Sodium chloride (Sigma-Aldrich, 7647-14-5), Citric acid (Sigma-  
448 Aldrich, 77-92-9).

449 **Chemicals used in cell dissociation experiments:** elastase (Sigma-Aldrich, E0258),  
450 collagenase (Sigma-Aldrich, C9722), PBS (Thermo Fisher Scientific, AM9624), BSA  
451 (Thermo Fisher Scientific, AM2616), Murine inhibitor (New England Biolabs (NEB,  
452 M0314L).

453

#### 454 **Calcium imaging.**

455 The semi-intact sample for calcium-imaging recordings was prepared as previously described  
456 (57). 3<sup>rd</sup> instar larval heads comprising chemosensory neurons, the brain and the connecting  
457 nerves were dissected in AHL (adult hemolymph like) saline solution. The tissue was  
458 introduced into the microfluidic chip and the sample was connected to the tubing and  
459 micropump setup. For whole organ TOG recordings *UAS-GCaMP6m* (55) was used to  
460 genetically label all neurons and *RFP* was expressed in nuclei using *UAS-H2B:RFP* (56).

461 Stacks were set to 15 slices of 1,5  $\mu\text{m}$  thickness each, pixel binning of 2, with resulting time  
462 acquisition speed of 0.5 stacks (time-points) per second. For recordings from *VGlut-Gal4*  
463 neurons, we used the same UAS reporter lines to image the three neurons belonging to the  
464 TOG and the DOG, but due to a deeper tissue extending over both organs, we set the stacks to  
465 25 slices of 2,5  $\mu\text{m}$  thickness each, preserving the time acquisition speed.

466 The microscope of choice was a spinning-disk confocal Visitron CSU-W1. Recordings were  
467 exported as .nd files and further processed in Fiji/ImageJ and Imaris software. For each  
468 recording an RFP stack was acquired prior to the CGaMP time-series.

469 **Taste Stimulation.** Each tastant was administered using a micropump (mp6, Bartels  
470 Mikrotechnik) controlled in VisiView software through built-in macros. Millipore water was  
471 used as solvent for taste solutions and as washing control. For each taste stimulation macros  
472 were designed for 2-minute recordings to allow 1 minute pre-wash followed by 30-second  
473 stimulation and a final 30-second wash.

474 **Taste stimulation with series of individual tastants.** The sequence of chemicals within a  
475 trial was randomized. We used two series of tastants (Suppl.Table 1), each containing 5  
476 substances from 5 different taste categories. Series 1 consisted of sucrose (sweet), denatonium  
477 (bitter), NaCl 1M (high salt), valine (amino acid) and citric acid (sour). Series 2 consisted of  
478 sucrose, quinine (bitter), NaCl 100mM (low salt), arginine (amino acid) and citric acid. Each  
479 recorded animal was stimulated with all the tastants within one series. A total of 15 TOG  
480 organs were recorded, 7 for series 1 and 8 for series 2.

481 **Taste stimulation with groups of tastants.** We compiled 2 groups of sugars, each containing  
482 5 sugars at a concentration of 100 mM each: monosaccharides (fructose, glucose, arabinose,  
483 mannose, galactose), and disaccharides (sucrose, trehalose, maltose, lactose, cellobiose).  
484 Amino acids were prepared in 4 groups (A, B, C and D) as previously described by Park et al.

485 (59) (Suppl.Table 1). Tyrosine was included in group B at a concentration of 1mM. Salt taste  
486 groups contained NaCl and KCl in equal proportions at a total concentration of 50mM (low  
487 salt) and respectively 1M (high salt). Bitter tastants were randomized in 2 groups of 4  
488 substances each, with a final concentration of 22mM and respectively 13mM, restricted by the  
489 solubility of certain substances such as lobeline or strychnine reduced to 1mM instead of  
490 10mM (Suppl.Table 1): DSoTC group (denatonium benzoate, sucrose octaacetate,  
491 theophylline, coumarin), and respectively QLSC group (quinine, lobeline, strychnine,  
492 caffeine).

493 **Mechanical stimulation.** Macros were adjusted to switch water flow between on and off at  
494 30-second interval. The sample was exposed to water in both conditions; therefore,  
495 corresponding neuronal responses were interpreted to be result of shear stress mechanical  
496 stimulation (75) and not caused by water taste.

497

#### 498 **Data processing and analysis of whole-organ physiological recordings.**

499 We first carried out deconvolution processing on Huygens platform of RFP stacks and  
500 GCaMP recordings. A Fiji/ImageJ plugin was written to duplicate the RFP signal onto all  
501 time-points of the CGaMP recording (Suppl.Fig.1A). If the animal movement was  
502 considerable, a 3D drift correction was applied on the GFP signal before merging the two  
503 channels. Eventual misalignment between the two signals (caused by drifts or animal  
504 movement) was corrected by writing a Fiji/ImageJ macro for manually guided realignment  
505 (Suppl.Fig.1B). A final 3D drift correction (89) was then performed for better stabilization.  
506 The recording was transferred in Imaris for automatic segmentation with spots of 3,5um  
507 diameter. Each uniquely identified neuron though spot detection received an identity and a  
508 corresponding fluorescence trace over time (Suppl.Fig.1C). An extra spot was created in

509 proximity to the organ, serving as background fluorescence to be subtracted from all cell  
510 spots. Signal processing and downstream analysis were performed with R (90, 91).  
511 Normalization of fluorescence values followed the formula  $(F_t - F_0)/F_0$ ,  $F_t$  being the intensity  
512 at timepoint  $t$  and  $F_0$  the baseline as average intensity of 10 frames prior stimulation.  
513 Response amplitude was calculated as the difference between the peak intensity after  
514 stimulation (average of 5 frames near the maximal fluorescence value) and  $F_0$ . All traces were  
515 individually inspected to exclude false positive responses. Responses were considered for  
516 further analysis if their amplitude was minimum 20%  $DF/F_0$ . To calculate taste integration  
517 percentages (Fig.2), for each a specific dataset we selected all responding neurons and then  
518 determined the fraction of neurons activated by one or by multiple tastants / taste groups per  
519 animal. Illustrative lists of responding neurons as well as number of neurons and responses  
520 considered for analysis within each test category were assembled in Supplementary File 1.  
521 Neurons responding to individual tastants were mapped across organs (Fig.4) by manually  
522 assessing their relative position and physiological response. Supplementary File 2 contains he  
523 activation or deactivation values with frequencies of response above 20% for mapped neurons  
524 and the corresponding Wilcoxon signed rank nonparametric test p-values. Figures were  
525 generated in RStudio (92) using “ggplot2”, “reshape2” and “scales” packages (93-95) or in  
526 GraphPad Prism 7 and adjusted in Adobe Illustrator.

527 **Calcium imaging analysis of *VGlut*-positive cells.** For recordings of *VGlut*-Gal4 neurons,  
528 analysis was entirely performed in Fiji/ImageJ. Cell segmentation was replaced by setting  
529 regions of interest (ROI) around each of the 3 somas and fluorescence intensity over time was  
530 extracted after applying a z-projection of the stack recordings. Normalization was performed  
531 as above and all taste responses were compared to water response for each neuron. Response  
532 values and Mann-Whitney tests of comparisons with control were compiled in Supplementary  
533 File 3. Analysis and figures were generated in GraphPad Prism 7.



534

535 **Single-cell chemosensory cell suspension preparation for DisCo.**

536 3<sup>rd</sup> instar larvae of genotype *nsyb-Gal4 > UAS-mcd8:GFP; Or83b:RFP* were collected from  
537 food, washed in tap water, PBS, dropped in ethanol and again PBS and dissected in ice-cold  
538 PBS in such a manner that only the external chemosensory organs were kept, avoiding to  
539 include also the pharyngeal tissue containing internal chemosensory organs. The isolated  
540 material was then placed on ice in elastase 1 mg/ml in siliconized 2-ml tubes. After dissecting  
541 20-30 larvae (20-25 minutes), the tube sample was placed at room temperature to initiate  
542 digestion. After 30 minutes the tissues was washed in PBS+BSA0,05% and dissociated by up-  
543 down pipetting for 120 times using siliconized 200p pipette tips. Separated TOG and DOG  
544 organs were detected using a fluorescence stereomicroscope and manually picked with a glass  
545 micropipette, placed in a final dissociation enzyme mix of Collagenase 1mg/ml + Elastase  
546 0,5mg/ml for 10-15 minutes for single cell suspension. The reaction was stopped with PBS +  
547 BSA 0,05%. Murine inhibitor was added at each step of the dissociation protocol.

548 **Deterministic co-encapsulation (DisCo) of chemosensory neurons for single cell**  
549 **transcriptomics.**

550 Microfluidic chip design, fabrication and device handling are described elsewhere (50).  
551 Following organ dissociation, target cell suspension was diluted in the cell loading buffer  
552 containing PBS 0.01 % BSA (Sigma B8667), 6% Optiprep (Sigma D1556) and Murine  
553 RNase inhibitor (NEB M0314L) in the loading tip connected to the DisCo chip. After bead-  
554 cell in droplet co-encapsulation, sample droplets were transferred to a bead collection chip.  
555 Subsequently to bead capture, washing, reverse transcription (Thermo Scientific EP0753) and  
556 Exonuclease I (NEB M0293L) reactions were performed on-chip (61). Beads containing  
557 cDNA were then eluted and cDNA was amplified for 21 cycles using Kapa HiFi Hot start

558 ready mix (Roche #07958935001). Amplified cDNA was then purified (GC biotech PCR-  
559 0050) for quality assessment with Fragment Analyzer (Agilent). Libraries were then  
560 tagged using in-house Tn5 (96), size selected and purified for sequencing on NextSeq 500  
561 system (Illumina) following recommendations from original Drop-seq protocol (97) (20 bp  
562 for read 1 and 50 bp for read2) at sequencing depth above 400,000 reads per cell.

563 **Single-cell data pre-processing and analysis.** The data analysis was performed using the  
564 Drop-seq tools package (62). After pre-processing, reads were aligned to *Drosophila*  
565 *melanogaster* reference genome (Ensembl version 86) using STAR (version 2.7.0.e) (98).  
566 Following the alignment, BAM files were processed using the initial package and read-count  
567 matrices were generated.

568 Downstream analysis was done using the Seurat package (65) version 3.1.2 in RStudio.  
569 Individual data sets were loaded and used to create separate normalized and scaled Seurat  
570 objects of minimum 400 genes per cell. In order to apply unique cell filters we merged the  
571 data and then excluded cells with high gene number and high UMIs as potential doublets and  
572 cells with high mitochondrial gene percentage indicating potential apoptotic cells. Due to  
573 observed correlation between cells with high gene number (nGene, Suppl.Fig.5B) and cells  
574 with high UMIs (nCount, Suppl.Fig.5B), by applying UMI threshold at 50000 we also  
575 eliminated cells with more than 4000 genes. Cells with mitochondrial gene percentage under  
576 9% were kept for further analysis (Suppl.Fig.5B). Data was then integrated to circumvent  
577 batch effects using Seurat functions *FindIntegrationAnchors* and *IntegrateData*. As we were  
578 interested in characterizing neurons, we used the *subset* function to keep only cells expressing  
579 *nSyb* or *peb* neuronal markers, excluding eventual surrounding tissue or cuticle cells. On the  
580 final dataset of 153 neurons PCA (principal component analysis) computation was followed  
581 by UMAP embedding and clustering (Suppl.Fig.5C) was performed at 0.5 resolution.

## 582   **References**

583

- 584   1.     Gerber B, Stocker RF. The *Drosophila* larva as a model for studying chemosensation  
585   and chemosensory learning: a review. *Chemical senses*. 2007;32(1):65-89.
- 586   2.     El-Keredy A, Schleyer M, Konig C, Ekim A, Gerber B. Behavioural analyses of  
587   quinine processing in choice, feeding and learning of larval *Drosophila*. *PLoS One*.  
588   2012;7(7):e40525.
- 589   3.     Konig C, Schleyer M, Leibiger J, El-Keredy A, Gerber B. Bitter-sweet processing in  
590   larval *Drosophila*. *Chem Senses*. 2014;39(6):489-505.
- 591   4.     Kim H, Choi MS, Kang K, Kwon JY. Behavioral Analysis of Bitter Taste Perception  
592   in *Drosophila* Larvae. *Chem Senses*. 2016;41(1):85-94.
- 593   5.     Schipanski A, Yarali A, Niewalda T, Gerber B. Behavioral analyses of sugar  
594   processing in choice, feeding, and learning in larval *Drosophila*. *Chem Senses*.  
595   2008;33(6):563-73.
- 596   6.     Croset V, Schleyer M, Arguello JR, Gerber B, Benton R. A molecular and neuronal  
597   basis for amino acid sensing in the *Drosophila* larva. *Sci Rep*. 2016;6:34871.
- 598   7.     Kudow N, Miura D, Schleyer M, Toshima N, Gerber B, Tanimura T. Preference for  
599   and learning of amino acids in larval *Drosophila*. *Biol Open*. 2017;6(3):365-9.
- 600   8.     Stocker RF. The organization of the chemosensory system in *Drosophila*  
601   *melanogaster*: a review. *Cell and tissue research*. 1994;275(1):3-26.
- 602   9.     Stocker RF. Design of the larval chemosensory system. *Adv Exp Med Biol*.  
603   2008;628:69-81.
- 604   10.    Chandrashekar J, Hoon MA, Ryba NJ, Zuker CS. The receptors and cells for  
605   mammalian taste. *Nature*. 2006;444(7117):288-94.
- 606   11.    Huang AL, Chen XK, Hoon MA, Chandrashekar J, Guo W, Trankner D, et al. The  
607   cells and logic for mammalian sour taste detection. *Nature*. 2006;442(7105):934-8.
- 608   12.    Yarmolinsky DA, Zuker CS, Ryba NJ. Common sense about taste: from mammals to  
609   insects. *Cell*. 2009;139(2):234-44.
- 610   13.    Barretto RPJ, Gillis-Smith S, Chandrashekar J, Yarmolinsky DA, Schnitzer MJ, Ryba  
611   NJP, et al. The neural representation of taste quality at the periphery. *Nature*.  
612   2015;517(7534):373-U511.
- 613   14.    Smith DV, St John SJ. Neural coding of gustatory information. *Curr Opin Neurobiol*.  
614   1999;9(4):427-35.
- 615   15.    Wu A, Dvoryanchikov G, Pereira E, Chaudhari N, Roper SD. Breadth of tuning in  
616   taste afferent neurons varies with stimulus strength. *Nature Communications*. 2015;6.
- 617   16.    Tomchik SM, Berg S, Kim JW, Chaudhari N, Roper SD. Breadth of tuning and taste  
618   coding in mammalian taste buds. *Journal of Neuroscience*. 2007;27(40):10840-8.
- 619   17.    Chaudhari N, Roper SD. The cell biology of taste. *J Cell Biol*. 2010;190(3):285-96.
- 620   18.    Dahanukar A, Lei YT, Kwon JY, Carlson JR. Two Gr genes underlie sugar reception  
621   in *Drosophila*. *Neuron*. 2007;56(3):503-16.
- 622   19.    Fujii S, Yavuz A, Slone J, Jagge C, Song X, Amrein H. *Drosophila* Sugar Receptors  
623   in Sweet Taste Perception, Olfaction, and Internal Nutrient Sensing. *Curr Biol*. 2015.

- 624 20. Thorne N, Chromey C, Bray S, Amrein H. Taste perception and coding in *Drosophila*.  
625 *Curr Biol*. 2004;14(12):1065-79.
- 626 21. Liman ER, Zhang YV, Montell C. Peripheral coding of taste. *Neuron*.  
627 2014;81(5):984-1000.
- 628 22. French A, Ali Agha M, Mitra A, Yanagawa A, Sellier MJ, Marion-Poll F. *Drosophila*  
629 Bitter Taste(s). *Front Integr Neurosci*. 2015;9:58.
- 630 23. Zhang YV, Ni J, Montell C. The molecular basis for attractive salt-taste coding in  
631 *Drosophila*. *Science*. 2013;340(6138):1334-8.
- 632 24. Hussain A, Zhang M, Ucpunar HK, Svensson T, Quillery E, Gompel N, et al.  
633 Iontropic Chemosensory Receptors Mediate the Taste and Smell of Polyamines. *Plos*  
634 *Biology*. 2016;14(5).
- 635 25. Lee MJ, Sung HY, Jo H, Kim HW, Choi MS, Kwon JY, et al. Iontropic Receptor  
636 76b Is Required for Gustatory Aversion to Excessive Na<sup>+</sup> in *Drosophila*. *Mol Cells*.  
637 2017;40(10):787-95.
- 638 26. Tauber JM, Brown EB, Li Y, Yurgel ME, Masek P, Keene AC. A subset of sweet-  
639 sensing neurons identified by IR56d are necessary and sufficient for fatty acid taste. *PLoS*  
640 *Genet*. 2017;13(11):e1007059.
- 641 27. Ahn JE, Chen Y, Amrein H. Molecular basis of fatty acid taste in *Drosophila*. *Elife*.  
642 2017;6.
- 643 28. Ganguly A, Pang L, Duong VK, Lee A, Schoniger H, Varady E, et al. A Molecular  
644 and Cellular Context-Dependent Role for Ir76b in Detection of Amino Acid Taste. *Cell Rep*.  
645 2017;18(3):737-50.
- 646 29. Sanchez-Alcaniz JA, Silbering AF, Croset V, Zappia G, Sivasubramaniam AK, Abuin  
647 L, et al. An expression atlas of variant ionotropic glutamate receptors identifies a molecular  
648 basis of carbonation sensing. *Nat Commun*. 2018;9(1):4252.
- 649 30. Jaeger AH, Stanley M, Weiss ZF, Musso PY, Chan RC, Zhang H, et al. A complex  
650 peripheral code for salt taste in *Drosophila*. *Elife*. 2018;7.
- 651 31. Vosshall LB, Stocker RF. Molecular architecture of smell and taste in *Drosophila*.  
652 *Annual review of neuroscience*. 2007;30:505-33.
- 653 32. Scott K, Brady R, Jr., Cravchik A, Morozov P, Rzhetsky A, Zuker C, et al. A  
654 chemosensory gene family encoding candidate gustatory and olfactory receptors in  
655 *Drosophila*. *Cell*. 2001;104(5):661-73.
- 656 33. Colomb J, Grillenzoni N, Ramaekers A, Stocker RF. Architecture of the primary taste  
657 center of *Drosophila melanogaster* larvae. *The Journal of comparative neurology*.  
658 2007;502(5):834-47.
- 659 34. Rimal S, Lee Y. The multidimensional ionotropic receptors of *Drosophila*  
660 *melanogaster*. *Insect Mol Biol*. 2018;27(1):1-7.
- 661 35. Stewart S, Koh TW, Ghosh AC, Carlson JR. Candidate ionotropic taste receptors in  
662 the *Drosophila* larva. *Proc Natl Acad Sci U S A*. 2015.
- 663 36. Alves G, Salle J, Chaudy S, Dupas S, Maniere G. High-NaCl perception in  
664 *Drosophila melanogaster*. *J Neurosci*. 2014;34(33):10884-91.
- 665 37. Mast JD, De Moraes CM, Alborn HT, Lavis LD, Stern DL. Evolved differences in  
666 larval social behavior mediated by novel pheromones. *Elife*. 2014;3:e04205.

- 667 38. Xu J, Sornborger AT, Lee JK, Shen P. *Drosophila* TRPA channel modulates sugar-  
668 stimulated neural excitation, avoidance and social response. *Nat Neurosci.* 2008;11(6):676-  
669 82.
- 670 39. Kwon JY, Dahanukar A, Weiss LA, Carlson JR. Molecular and cellular organization  
671 of the taste system in the *Drosophila* larva. *The Journal of neuroscience : the official journal*  
672 *of the Society for Neuroscience.* 2011;31(43):15300-9.
- 673 40. Apostolopoulou AA, Rist A, Thum AS. Taste processing in *Drosophila* larvae.  
674 *frontiers in integrative Neuroscience.* 2015;9.
- 675 41. Python F, Stocker RF. Adult-like complexity of the larval antennal lobe of *D.*  
676 *melanogaster* despite markedly low numbers of odorant receptor neurons. *J Comp Neurol.*  
677 2002;445(4):374-87.
- 678 42. Gendre N, Luer K, Friche S, Grillenzoni N, Ramaekers A, Technau GM, et al.  
679 Integration of complex larval chemosensory organs into the adult nervous system of  
680 *Drosophila*. *Development.* 2004;131(1):83-92.
- 681 43. Larsson MC, Domingos AI, Jones WD, Chiappe ME, Amrein H, Vosshall LB. Or83b  
682 encodes a broadly expressed odorant receptor essential for *Drosophila* olfaction. *Neuron.*  
683 2004;43(5):703-14.
- 684 44. Kreher SA, Kwon JY, Carlson JR. The molecular basis of odor coding in the  
685 *Drosophila* larva. *Neuron.* 2005;46(3):445-56.
- 686 45. Fishilevich E, Domingos AI, Asahina K, Naef F, Vosshall LB, Louis M. Chemotaxis  
687 behavior mediated by single larval olfactory neurons in *Drosophila*. *Current biology : CB.*  
688 2005;15(23):2086-96.
- 689 46. Mathew D, Martelli C, Kelley-Swift E, Brusalis C, Gershow M, Samuel AD, et al.  
690 Functional diversity among sensory receptors in a *Drosophila* olfactory circuit. *Proc Natl*  
691 *Acad Sci U S A.* 2013;110(23):E2134-43.
- 692 47. Si G, Kanwal JK, Hu Y, Tabone CJ, Baron J, Berck M, et al. Structured Odorant  
693 Response Patterns across a Complete Olfactory Receptor Neuron Population. *Neuron.*  
694 2019;101(5):950-62 e7.
- 695 48. van Giesen L, Hernandez-Nunez L, Delasoie-Baranek S, Colombo M, Renaud P,  
696 Bruggmann R, et al. Multimodal stimulus coding by a gustatory sensory neuron in  
697 *Drosophila* larvae. *Nat Commun.* 2016;7:10687.
- 698 49. Rist A, Thum AS. A map of sensilla and neurons in the taste system of *drosophila*  
699 larvae. *J Comp Neurol.* 2017;525(18):3865-89.
- 700 50. Bues J, Biočanin M, Pezoldt J, Dainese R, Chrisnandy A, Rezakhani S, et al.  
701 Deterministic scRNA-seq of individual intestinal organoids reveals new subtypes and  
702 coexisting distinct stem cell pools. *BioRxiv.* 2020.
- 703 51. Su CY, Menuz K, Reiser J, Carlson JR. Non-synaptic inhibition between grouped  
704 neurons in an olfactory circuit. *Nature.* 2012;492(7427):66-71.
- 705 52. Zhang Y, Tsang TK, Bushong EA, Chu LA, Chiang AS, Ellisman MH, et al.  
706 Asymmetric ephaptic inhibition between compartmentalized olfactory receptor neurons. *Nat*  
707 *Commun.* 2019;10(1):1560.
- 708 53. Python F, Stocker RF. Immunoreactivity against choline acetyltransferase, gamma-  
709 aminobutyric acid, histamine, octopamine, and serotonin in the larval chemosensory system  
710 of *Drosophila melanogaster*. *J Comp Neurol.* 2002;453(2):157-67.

- 711 54. Brunet Avalos C, Maier GL, Bruggmann R, Sprecher SG. Single cell transcriptome  
712 atlas of the *Drosophila* larval brain. *Elife*. 2019;8.
- 713 55. Chen TW, Wardill TJ, Sun Y, Pulver SR, Renninger SL, Baohan A, et al.  
714 Ultrasensitive fluorescent proteins for imaging neuronal activity. *Nature*.  
715 2013;499(7458):295-300.
- 716 56. Egger B, Boone JQ, Stevens NR, Brand AH, Doe CQ. Regulation of spindle  
717 orientation and neural stem cell fate in the *Drosophila* optic lobe. *Neural Dev*. 2007;2:1.
- 718 57. van Giesen L, Neagu-Maier GL, Kwon JY, Sprecher SG. A microfluidics-based  
719 method for measuring neuronal activity in *Drosophila* chemosensory neurons. *Nat Protoc*.  
720 2016;11(12):2389-400.
- 721 58. Marella S, Fischler W, Kong P, Asgarian S, Rueckert E, Scott K. Imaging taste  
722 responses in the fly brain reveals a functional map of taste category and behavior. *Neuron*.  
723 2006;49(2):285-95.
- 724 59. Park J, Carlson JR. Physiological responses of the *Drosophila* labellum to amino  
725 acids. *J Neurogenet*. 2018;32(1):27-36.
- 726 60. Faber DS, Pereda AE. Two Forms of Electrical Transmission Between Neurons.  
727 *Front Mol Neurosci*. 2018;11:427.
- 728 61. Biocanin M, Bues J, Dainese R, Amstad E, Deplancke B. Simplified Drop-seq  
729 workflow with minimized bead loss using a bead capture and processing microfluidic chip.  
730 *Lab Chip*. 2019;19(9):1610-20.
- 731 62. Macosko EZ, Basu A, Satija R, Nemesh J, Shekhar K, Goldman M, et al. Highly  
732 Parallel Genome-wide Expression Profiling of Individual Cells Using Nanoliter Droplets.  
733 *Cell*. 2015;161(5):1202-14.
- 734 63. Klein AM, Macosko E. InDrops and Drop-seq technologies for single-cell  
735 sequencing. *Lab Chip*. 2017;17(15):2540-1.
- 736 64. Satija R, Farrell JA, Gennert D, Schier AF, Regev A. Spatial reconstruction of single-  
737 cell gene expression data. *Nat Biotechnol*. 2015;33(5):495-502.
- 738 65. Stuart T, Butler A, Hoffman P, Hafemeister C, Papalexi E, Mauck WM, 3rd, et al.  
739 Comprehensive Integration of Single-Cell Data. *Cell*. 2019;177(7):1888-902 e21.
- 740 66. Rusch DB, Kaufman TC. Regulation of proboscipedia in *Drosophila* by homeotic  
741 selector genes. *Genetics*. 2000;156(1):183-94.
- 742 67. Salvaterra PM, Kitamoto T. *Drosophila* cholinergic neurons and processes visualized  
743 with Gal4/UAS-GFP. *Brain Res Gene Expr Patterns*. 2001;1(1):73-82.
- 744 68. Stocker RF. The Organization of the Chemosensory System in *Drosophila*-  
745 *Melanogaster* - a Review. *Cell and Tissue Research*. 1994;275(1):3-26.
- 746 69. Chu-Wang IW, Axtell RC. Fine structure of the terminal organ of the house fly larva,  
747 *Musca domestica* L. *Z Zellforsch Mikrosk Anat*. 1972;127(3):287-305.
- 748 70. Jeong YT, Oh SM, Shim J, Seo JT, Kwon JY, Moon SJ. Mechanosensory neurons  
749 control sweet sensing in *Drosophila*. *Nat Commun*. 2016;7:12872.
- 750 71. Sanchez-Alcaniz JA, Zappia G, Marion-Poll F, Benton R. A mechanosensory receptor  
751 required for food texture detection in *Drosophila*. *Nat Commun*. 2017;8:14192.
- 752 72. Apostolopoulou AA, Hersperger F, Mazija L, Widmann A, Wust A, Thum AS.  
753 Composition of agarose substrate affects behavioral output of *Drosophila* larvae. *Frontiers in*  
754 *behavioral neuroscience*. 2014;8:11.

- 755 73. Kudow N, Kamikouchi A, Tanimura T. Softness sensing and learning in *Drosophila*  
756 larvae. *J Exp Biol*. 2019;222(Pt 7).
- 757 74. Tracey WD, Jr., Wilson RI, Laurent G, Benzer S. painless, a *Drosophila* gene  
758 essential for nociception. *Cell*. 2003;113(2):261-73.
- 759 75. Brown TD. Techniques for mechanical stimulation of cells in vitro: a review. *J*  
760 *Biomech*. 2000;33(1):3-14.
- 761 76. Reiter S, Campillo Rodriguez C, Sun K, Stopfer M. Spatiotemporal Coding of  
762 Individual Chemicals by the Gustatory System. *J Neurosci*. 2015;35(35):12309-21.
- 763 77. Hernandez-Nunez L, Belina J, Klein M, Si G, Claus L, Carlson JR, et al. Reverse-  
764 correlation analysis of navigation dynamics in larva using optogenetics. *Elife*. 2015;4.
- 765 78. Jisoo Han MC. Comprehensive functional screening of taste sensation in vivo.  
766 bioRxiv. 2018.
- 767 79. Smith DV, Travers JB. Metric for the Breadth of Tuning of Gustatory Neurons.  
768 *Chemical Senses & Flavour*. 1979;4(3):215-29.
- 769 80. Jefferys JG. Nonsynaptic modulation of neuronal activity in the brain: electric  
770 currents and extracellular ions. *Physiol Rev*. 1995;75(4):689-723.
- 771 81. Miriyala A, Kessler S, Rind FC, Wright GA. Burst Firing in Bee Gustatory Neurons  
772 Prevents Adaptation. *Curr Biol*. 2018;28(10):1585-94 e3.
- 773 82. Saro G, Lia AS, Thapliyal S, Marques F, Busch KE, Glauser DA. Specific Ion  
774 Channels Control Sensory Gain, Sensitivity, and Kinetics in a Tonic Thermonociceptor. *Cell*  
775 *Rep*. 2020;30(2):397-408 e4.
- 776 83. Meissner GW, Nern A, Singer RH, Wong AM, Malkesman O, Long X. Mapping  
777 Neurotransmitter Identity in the Whole-Mount *Drosophila* Brain Using Multiplex High-  
778 Throughput Fluorescence in Situ Hybridization. *Genetics*. 2019;211(2):473-82.
- 779 84. Xu Y, Qin S, Niu Y, Gong T, Zhang Z, Fu Y. Effect of fluid shear stress on the  
780 internalization of kidney-targeted delivery systems in renal tubular epithelial cells. *Acta*  
781 *Pharm Sin B*. 2020;10(4):680-92.
- 782 85. White CR, Frangos JA. The shear stress of it all: the cell membrane and  
783 mechanochemical transduction. *Philos Trans R Soc Lond B Biol Sci*. 2007;362(1484):1459-  
784 67.
- 785 86. Al-Anzi B, Tracey WD, Jr., Benzer S. Response of *Drosophila* to wasabi is mediated  
786 by painless, the fly homolog of mammalian TRPA1/ANKTM1. *Curr Biol*. 2006;16(10):1034-  
787 40.
- 788 87. Singh RN, Singh K. Fine-Structure of the Sensory Organs of *Drosophila-*  
789 *Melanogaster* Meigen Larva (Diptera, Drosophilidae). *International Journal of Insect*  
790 *Morphology & Embryology*. 1984;13(4):255-73.
- 791 88. Schindelin J, Arganda-Carreras I, Frise E, Kaynig V, Longair M, Pietzsch T, et al.  
792 Fiji: an open-source platform for biological-image analysis. *Nat Methods*. 2012;9(7):676-82.
- 793 89. Parslow A, Cardona A, Bryson-Richardson RJ. Sample drift correction following 4D  
794 confocal time-lapse imaging. *J Vis Exp*. 2014(86).
- 795 90. Team RC. R: A language and environment for statistical computing. R Foundation for  
796 Statistical Computing, Vienna, Austria. URL <https://www.R-project.org/>. 2017.
- 797 91. Wickham H, FR, Henry L. and Müller K. dplyr: A Grammar of Data Manipulation. R  
798 package version 0.7.6. <https://CRAN.R-project.org/package=dplyr>. 2018.

- 799 92. Team R. RStudio: Integrated Development for R. 2015.  
800 93. Wickham H. Reshaping Data with the reshape Package. Journal of Statistical  
801 Software. 2007;21(12):1-20.  
802 94. Wickham H. ggplot2: Elegant Graphics for Data Analysis. 2009.  
803 95. Wickham H. SD, RStudio. scales: Scale Functions for Visualization. 2019.  
804 96. Picelli S, Bjorklund AK, Reinius B, Sagasser S, Winberg G, Sandberg R. Tn5  
805 transposase and tagmentation procedures for massively scaled sequencing projects. Genome  
806 Res. 2014;24(12):2033-40.  
807 97. Macosko E.Z. GM, McCarroll S.A. Drop-Seq Laboratory Protocol version 3.1. 2015.  
808 98. Dobin A, Davis CA, Schlesinger F, Drenkow J, Zaleski C, Jha S, et al. STAR:  
809 ultrafast universal RNA-seq aligner. Bioinformatics. 2013;29(1):15-21.

810



## 811 **Acknowledgements**

812 We thank the Sprecher lab for support and useful discussions and Joern Pezoldt, Wanze Chen  
813 and Maria Litovchenko from Deplancke lab for support, valuable comments and practical  
814 advice. We thank EPFL's Gene Expression Core Facility for sequencing support and  
815 Rommelaere Samuel from Lemaitre lab for providing fluorescent microscope during single-  
816 cell preparation experiments. We are also grateful to Boris Egger for guidance on microscopy  
817 and data analysis and to everyone who shared with us fly stocks and reagents.

## 818 **Author contributions**

819 GLM and SGS designed the study and wrote the paper. GLM performed physiological  
820 recordings, immunostainings, and single cell dissociation, analyzed the data and created the  
821 figures. MB and JB performed DisCo experiments and library preparation. FM wrote the  
822 plugins and macros necessary for calcium imaging data processing and assisted in  
823 establishing the analysis pipeline. CBA identified and determined *proboscipedia*  
824 immunofluorescence expression and assisted with single cell sequencing analysis in Seurat.  
825 BD, JYK and SGS assisted in interpretation of results.

826 **Additional information.** The authors declare no competing interests.

827 **Funding.** This project was supported by the Swiss National Science Foundation (project  
828 grant 310030\_188471) to SGS.

## 829 **Data Availability**

830 Single cell RNAseq data reported in this study are available on NCBI GEO; accession  
831 number GSE149975.

832 Fiji/ImageJ plugin and macro for calcium imaging data processing are available as  
833 supplementary file.

834 Data generated and analyzed within the present study are available from the corresponding  
835 author upon request.

836

837 **Figure 1: Peripheral taste neurons of the fruit fly larva – visualization and calcium**  
838 **imaging.**

839 A. The chemosensory system of the larva. External sense organs extend dendrites to the  
840 periphery and have main olfactory function – the DOG (dorsal organ ganglion), or  
841 gustatory function – the TOG (terminal organ ganglion) and the VOG (ventral organ  
842 ganglion). Dendrites of the internal dorsal, ventral and posterior pharyngeal sense organs  
843 (DPS, VPS and PPS) innervate the pharynx, thus involved in taste sensing during food  
844 ingestion. All chemosensory neurons project axons to the brain in the subesophageal  
845 ganglion (SOG) – first central taste integration relay – or to the antennal lobe (AL) for  
846 central olfactory processing. Adapted from (1).

847 B. External chemosensory organs. 7 GSNs previously identified and named C1-C7 are  
848 represented here by the color code they were first described with (39, 48). Used Gal4  
849 lines: *Gr22e*-Gal4 (C1), *Gr94a*-Gal4 (C2), *Gr59d*-Gal4 (C1, C2, C4), *Gr66a*-Gal4 (C1,  
850 C2, C3, C4), *Gr59e*-Gal4 (C5), *Gr21a*-Gal4 (C6), *GMR57B04*-Gal4 (C7).

851 C. UAS-*myrGFP* reporter was expressed in individual GSNs using corresponding Gal4 lines  
852 (B). We observed a relatively stereotypic position of specific neurons within the organ  
853 across animals ( $n \geq 3$ ) – exemplified on C6 and C1.

854 D. Illustrative 3D map of TOG segmented cells. Position of neurons with known identities  
855 (white dots) is approximated based on separate immunostainings.

856 E. Representative recording of the larval primary taste organ stimulated with citric acid  
857 100mM. Cytoplasmic expression of *GCaMP6m* and nuclear expression of *RFP* in all  
858 neurons (upper left panel) and cell segmentation (white spots, lower left panel).  
859 Responding neurons are indicated by blue, red and magenta arrows (upper right panel)  
860 and by dots and corresponding fluorescence traces of same colors (lower right panels).

861

862 **Supplementary Figure 1: Whole organ calcium imaging – data processing.**

863 A. The RFP nuclear signal acquired as a single stack was duplicated to all timepoints of the  
864 GCaMP time-series using an in-house written plugin. Step performed in Fiji/ImageJ.

865 B. On the recording comprising both fluorescence channels, any misalignment between the  
866 two signals due to animal movement or slight drift was corrected through a manually  
867 assisted macro. Step performed in Fiji/ImageJ.

868 C. The resulting stabilized and aligned recording was transferred to Imaris for cell  
869 segmentation (middle panel) and extraction of corresponding fluorescence traces (right  
870 panel). Traces of neurons responding to sucrose 500mM in a representative recording.  
871 Steps performed in Imaris and in RStudio.

872

873 **Supplementary Video 1: Whole organ recording and cell segmentation.**

874 The TOG (larval main peripheral taste organ) recorded using genetically encoded  
875 GCaMP reporter in all neurons. The second fluorophore, nuclear RFP, is used for cell  
876 segmentation, allowing creation of spots corresponding to each individual neuron.  
877 GCaMP fluorescence intensity over time for each spot is represented by spot color,  
878 ranging from blue (low signal) to red (high intensity).

879

880 **Figure 2: Taste neurons show high proportions of taste multimodality and opposed**  
881 **valence integration.**

882 A. GSN responses to series of individual tastants. Illustrative cell responses (y axis) for  
883 each tastant series (x axis). Colors were scaled to reflect the intensity of activation to the  
884 given taste. Only responses above 20% DF/F were taken into account. Taste stimulation

885 was done with 5 tastants per animal, each belonging to one of the 5 canonical taste  
886 modalities represented along the x axis: sweet (shades of red), bitter (blue), salt (purple),  
887 amino acids (brown) and sour (yellow). We used 2 different series of taste recordings.  
888 Series 1 consisted of sucrose 500mM for sweet taste, denatonium 10mM for bitter, NaCl  
889 1M for high salt, valine 100mM as amino acid and citric acid 100mM for sour taste;  
890 correspondingly, the second series consisted of sucrose 500mM, quinine 5mM, NaCl  
891 100mM for low salt, arginine 100mM and citric acid 100mM. 7 separate organs were  
892 recorded within the first series and 8 within the second (N=15). Total percentages of taste  
893 integration per neuron per animal are represented on the pie chart: 66% of total  
894 responding neurons were activated by only one tastant per organ and up to 34% of  
895 neurons responded to more than one tastant. Most unimodal responses (uni-taste / cell,  
896 left bar-chart) were recorded to sucrose and to high salt. Conversely, different  
897 combinations of taste categories were observed to activate single neurons, with different  
898 frequency of occurrence (multi-taste / cell, right bar-chart). The most frequent  
899 combinations of taste modalities per cell per animal were sweet + amino acid, sweet +  
900 sour, sour + high salt, sweet + high salt and sweet + bitter. Some of these combinations  
901 involve a presumed positive valence (sucrose/sweet) taste together with a negative  
902 valence taste (bitter or high salt) sensed by the same neuron.

903 B. Stimulation with groups of tastants comprising 2 sugar categories (mono and  
904 disaccharides), low and high salt concentration, 4 amino acid and 2 bitter groups.  
905 Responses of above 20% DF/F intensity threshold were considered.

906 Upper panels: Among all neurons responding to sugar group stimulation, we observed a  
907 comparable ratio of cells activated by only one sugar category and 25.4% activated by  
908 both mono and disaccharides. For salt-responding neurons, a higher proportion showed  
909 unique activation to high salt than to low salt concentration, and 20% neurons responded

910 to both categories. Amino acids split in 4 groups gave a rounded 62% to 38% ratio of uni-  
911 to multi-group response integration, calculated among all amino acid-responding neurons.  
912 Taking into account total responding neurons from animals stimulated with all 8 groups  
913 resulted in 60% to 40% uni- to multi-modality group response integration.

914 Lower panels: Within the total number of bitter-responsive neurons, 55% were uniquely  
915 activated by stimulation with DSoTC group and respectively 30% by QLSC group.  
916 Integration between sweet and bitter taste has been calculated on responding neurons  
917 from animals stimulated with 2 groups of each modality: we observed similar proportions  
918 of taste cells responding only to bitter groups (30,3%), cells responding only to sugar  
919 (39,4%) and cells responding to groups from both modalities (30,3%).

920

921 **Figure 3: GSNs can respond to taste through activation or deactivation.**

922 A. Illustration of a segmented TOG with two highlighted neighboring neurons (white  
923 dots) called CDL1, labeled in red and corresponding red fluorescence traces, and  
924 CDL2 with corresponding blue traces. When stimulated with citric acid 100mM CDL1  
925 generally responds with a canonical activation of fluorescence intensity increase, while  
926 the adjacent CDL2 responds with a simultaneous deactivation, or a fluorescence  
927 intensity decrease.

928 B. Cutting connections between chemosensory organs and brain (left panel illustration)  
929 did not abolish the synchronous activation-deactivation response to citric acid  
930 stimulation observed in CDL1-CDL2 neuronal couple (right panel).

931

932 **Figure 4: Mapping neuronal responses shows a high level of taste multimodality.**

- 933 A. Manual matching of responding GSNs across recorded organs (N=15) stimulated with  
934 series of individual tastants (Fig.2A). 21 neuronal identities displayed on the y-axis. The  
935 total response frequency (freq) of each neuron is represented in shades of grey (darker for  
936 higher frequency) and translates how often the given neuron has been recorded to respond  
937 above 20% DF/F0. For each mapped neuron the activation (yellow-red colors) and  
938 deactivation (light-dark blue colors) to a respective tastant is displayed as heatmap for  
939 both frequency and amplitude of response. Frequency of response (ovals) shows how  
940 consistently a mapped neuron responded to a particular tastant. Response amplitudes  
941 (squares) were plotted only for frequencies above 20% ( $N \geq 3$ ), scaled and reflected by  
942 color intensity of squares. To ease overall interpretation, denatonium and quinine were  
943 grouped under the label “bitter”, and valine and arginine as “amino acid”.
- 944 B. 3D representative visualization of matched neurons.
- 945 C. CDL1 is activated by sucrose, citric acid and high salt, responding most robustly (most  
946 frequently) to citric acid (red square, upper panel). By contrast, CDL2 is activated by  
947 sucrose and denatonium, eliciting fluorescence deactivation to sucrose, low salt and most  
948 frequently to citric acid (red square, lower panel).
- 949 D. AC1 is potentially the previously characterized C6 based on the very particular anterior  
950 position in the organ (as shown in Fig.1C) and on detected responses to sucrose and high  
951 salt, as previously described (48).

952

953 **Figure 5: Single-cell RNA sequencing of chemosensory neurons.**

- 954 A. Single cell dissociation protocol; manual picking of the fluorescently labelled sense  
955 organs. For chemosensory organ identification, green fluorescence can be driven in all  
956 neurons by a pan-neuronal driver line or in a subpopulation as labeled by *Ir76b*. *RFP* as a  
957 tag to *Orco*, olfactory co-receptor present in olfactory cells, labels only DOG.

958 B. Integrated data sets as a single object in Seurat, represented in an UMAP embedding. The  
959 final dataset after processing contains 153 cells expressing neuronal markers such as  
960 *Neuroglian (Nrg)*, *Synaptobrevin (Syb)*, *neuronal Synaptobrevin (nSyb)* or *pebbled (peb)*.  
961 C. *Odorant receptor co-receptor (Orco)* is expressed in the DOG and *proboscipedia (pb)* in  
962 the TOG. Their molecular expression appears largely non-overlapping in single cells.  
963 Immunostainings against the RFP-tagged *Orco* showed expression restricted to the DOG,  
964 as expected; *pb* expression shown by anti-Pb staining at embryonic stage labels TOG but  
965 not DOG neurons.

966

#### 967 **Supplementary Figure 5: Single-cell RNA sequencing of chemosensory neurons.**

968 A. Schematic principle of DisCo (Deterministic CO-encapsulation) with optimized co-  
969 encapsulation efficiency for minimal cell loss. DropSeq on a microfluidic chip  
970 equipped with valves that allow single cells (arrow in a.) to be stalled in a designated  
971 region (bottom square, b.) until a corresponding barcoded bead (arrow in b.) reaches a  
972 second designated region (upper square, c.) for their concomitant release into an oil  
973 droplet (d.).

974 B. Three data sets as biological and technical replicates were merged and filtered to  
975 eliminate cells with high gene number (nGene) or high UMIs (nCount) as potential  
976 indicator of doublets and cells with high mitochondrial gene expression as indicator of  
977 apoptotic cells. Correlation between high gene number and high UMIs (nGene vs nCount)  
978 was used for establishing filter thresholds. Integrated data was subset for neurons,  
979 resulting in a dataset of 153 cells above 400 genes per cell.

980 C. UMAP embedding in Seurat was colored by cell cluster association of cells. Neuronal  
981 marker *Syb* shows expression in both cell clusters, while *Orco* and *pb* show distinct  
982 expression roughly corresponding to the identified clusters.



983

984 **Figure 6: Neurotransmitters of chemosensory neurons show broad or narrow**

985 **expression.**

986 A. *Choline acetyltransferase (ChAT/Cha)* labels all chemosensory neurons using a *Cha-Gal4*  
987 driver (67) (left panels). Corresponding expression in UMAP embedding colored by  
988 expression (right panel). Scale bar, 10  $\mu\text{m}$ .

989 B. *TH* or *pale (ple)* is a tyrosine hydroxylase on the dopamine synthesis pathway, expressed  
990 in 2 TOG neurons as shown by anti-TH antibody staining (left panels). Corresponding *ple*  
991 molecular expression (right panel). Scale bar, 10  $\mu\text{m}$ .

992 C. *Vesicular glutamate transporter (VGlut)* shows restricted expression in 3 neurons, using a  
993 *VGlut-Gal4* line (left panels). *VGlut* narrow expression reflected in the UMAP embedding  
994 (right panel). Scale bar, 10  $\mu\text{m}$ .

995 D. Physiological responses of the 3 *VGlut* expressing cells stimulated with water as control  
996 and with eight tastants introduced earlier (Fig.2A & 4). Mann-Whitney statistical test was  
997 used for comparisons between responses to water and each tastant (Suppl.File3): TOG  
998 neuron (left panel) responded to sucrose and to valine; Mec (neuron localized anterior-  
999 laterally to TOG, middle panel) showed no responses distinct from water; DOG neuron  
1000 (right panel) responded to sucrose. Data presented as mean + SEM (error bars) and dots  
1001 represent individual responses from separate experiments.

1002

1003 **Supplementary Figure 6: *VGlut*-expressing TOG neuron does not co-localize with C2**

1004 **or with C7.**

1005 *VGlut*-positive TOG neuron (A.) does not share identity with C2 (B.), C7 (C.) or C1 (D.),  
1006 using corresponding Gal4 lines and comparing the number of GFP positive cells in  
1007 separate versus crossed lines. Scale bars, 10  $\mu\text{m}$ .

1008

1009 **Figure 7: Co-expression of neurotransmitter markers.**

- 1010 A. *DAT* and *Vmat* share expression in single cells (magenta dots, blue arrows), as  
1011 transporters of dopamine and respectively monoamines, the later inclusive of the first.  
1012 B. Double cholinergic and dopaminergic profile as illustrated by a few cells (blue arrows).  
1013 C. Co-expression of GABAergic *GABA-B-R2* and serotonergic *5-HT2B* receptors.  
1014 D. Neuropeptide *Nplp4* present in a few *VGlut*-positive cells.  
1015 E. Neuropeptide *Nplp2* co-localizes with *Vmat* (blue arrows).

1016

1017 **Figure 8: Chemosensory neurons express mechanosensory markers.**

- 1018 A. *nan*-Gal4 labels 1 TOG and 1 DOG neuron (left panel), scarce expression mirrored by the  
1019 UMAP embedding colored by expression (right panel). Scale bar, 10  $\mu$ m.  
1020 B. *nompC*-Gal4 has been identified in 3 chemosensory cells (left panel), paralleled by  
1021 UMAP embedding (right panel). Scale bar, 10  $\mu$ m.  
1022 C. *pain*-Gal4 labels a larger subpopulation of TOG neurons. We recorded neuronal response  
1023 of *pain*-expressing neurons pre-exposed to water: mechanical stimulation produced by  
1024 water pump switch ON/OFF. Responding cells in a 3D representation and respective  
1025 fluorescence traces. Representative traces for 3 cells, each from two different animals.

1026

1027 **Supplementary Figure 8: Response to both gustatory and mechanical stimulation in a**  
1028 **TOG neuron.**

- 1029 CM1 cell identified in a pan-neuronal whole-organ recording responds to sucrose 500mM  
1030 and is deactivated when the water flow pump is turned on. The cell was already exposed

1031 to water inside the microfluidic channel, and therefore the response is likely not  
1032 determined by water itself but by shear stress on the cell membrane.

1033

1034 **Supplementary Table 1. Chemicals used for taste stimulation.**

1035 **Supplementary File 1. Data referring to Fig.2.**

1036 **Supplementary File 2. Data referring to Fig.4.**

1037 **Supplementary File 3. Data referring to Fig.6C.**

1038 **Supplementary File 4. Whole organ calcium imaging, data processing, Suppl.Fig1 –**  
1039 **ImageJ scripts and pipeline instruction files.**

**Figure 1: Individual neurons of the TOG**

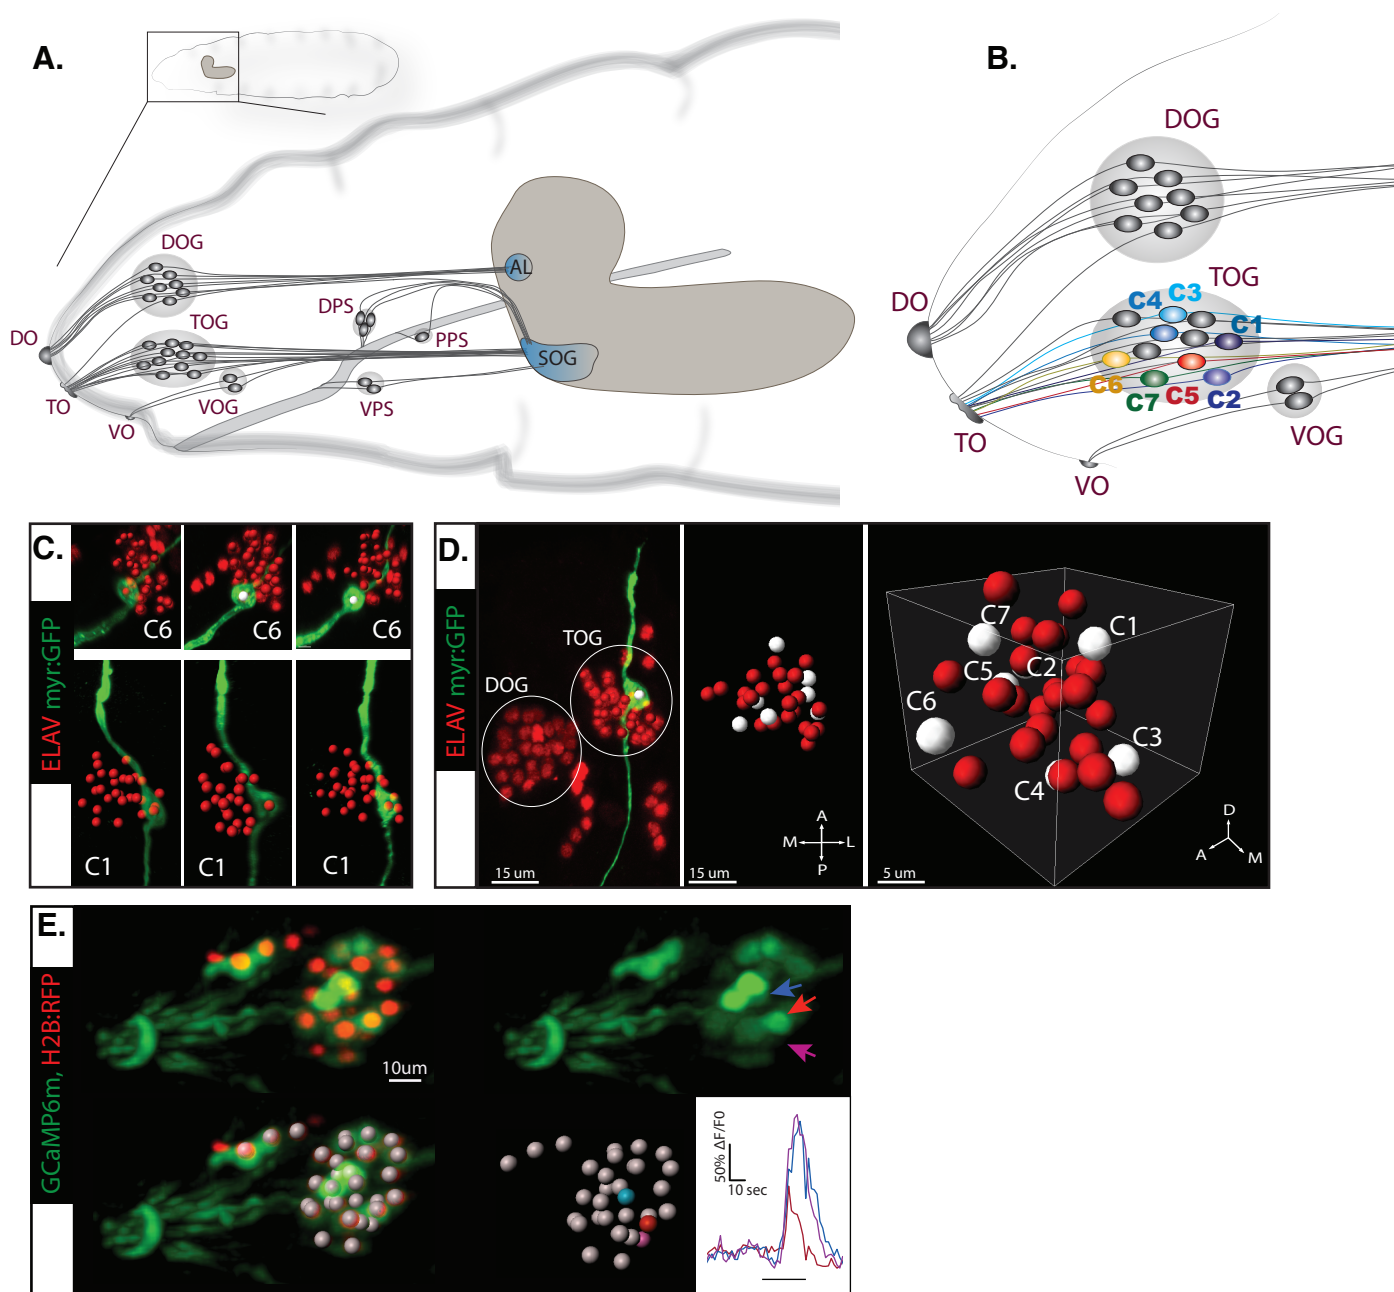

## Supplementary Figure 1: Whole-organ recording -data processing.

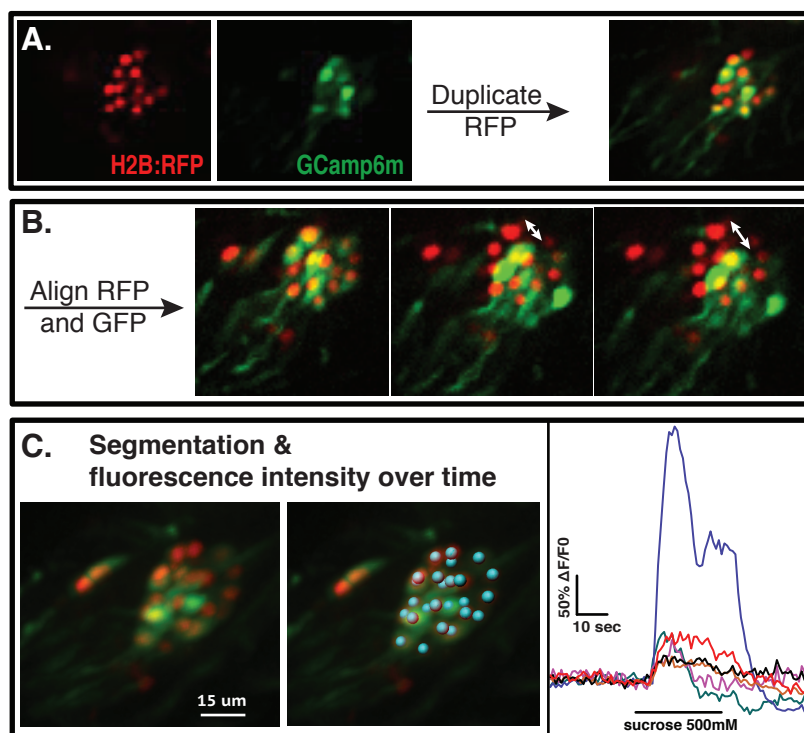

**Figure 2: Tuning of response.**

**A. GSN responses to series of individual tastants.**

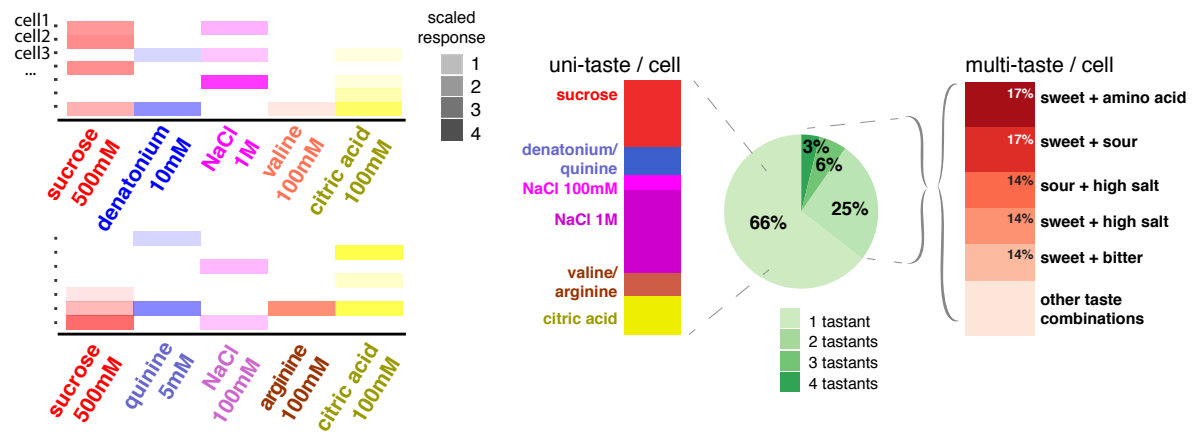

**B. GSN responses to taste groups.**

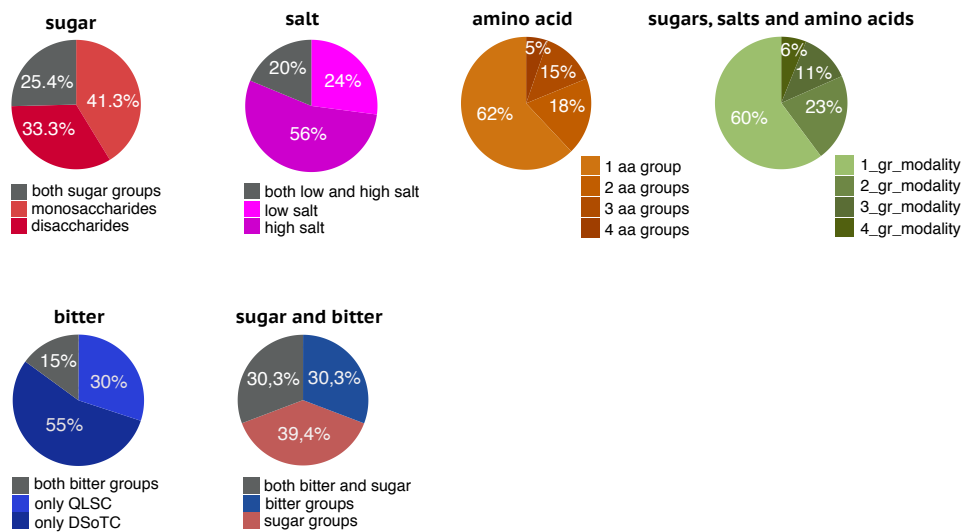

**Figure 3: Activation and deactivation responses in taste neurons.**

**A.**

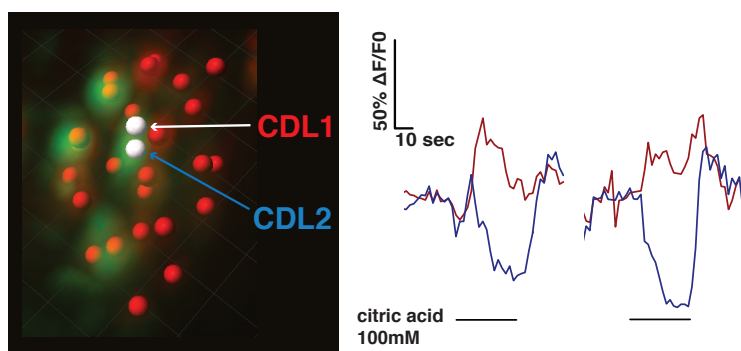

**B.**

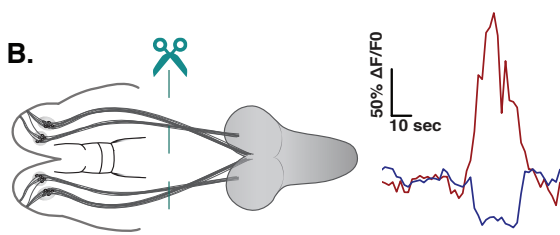

**Figure 4: Map of intensity and frequency of response.**

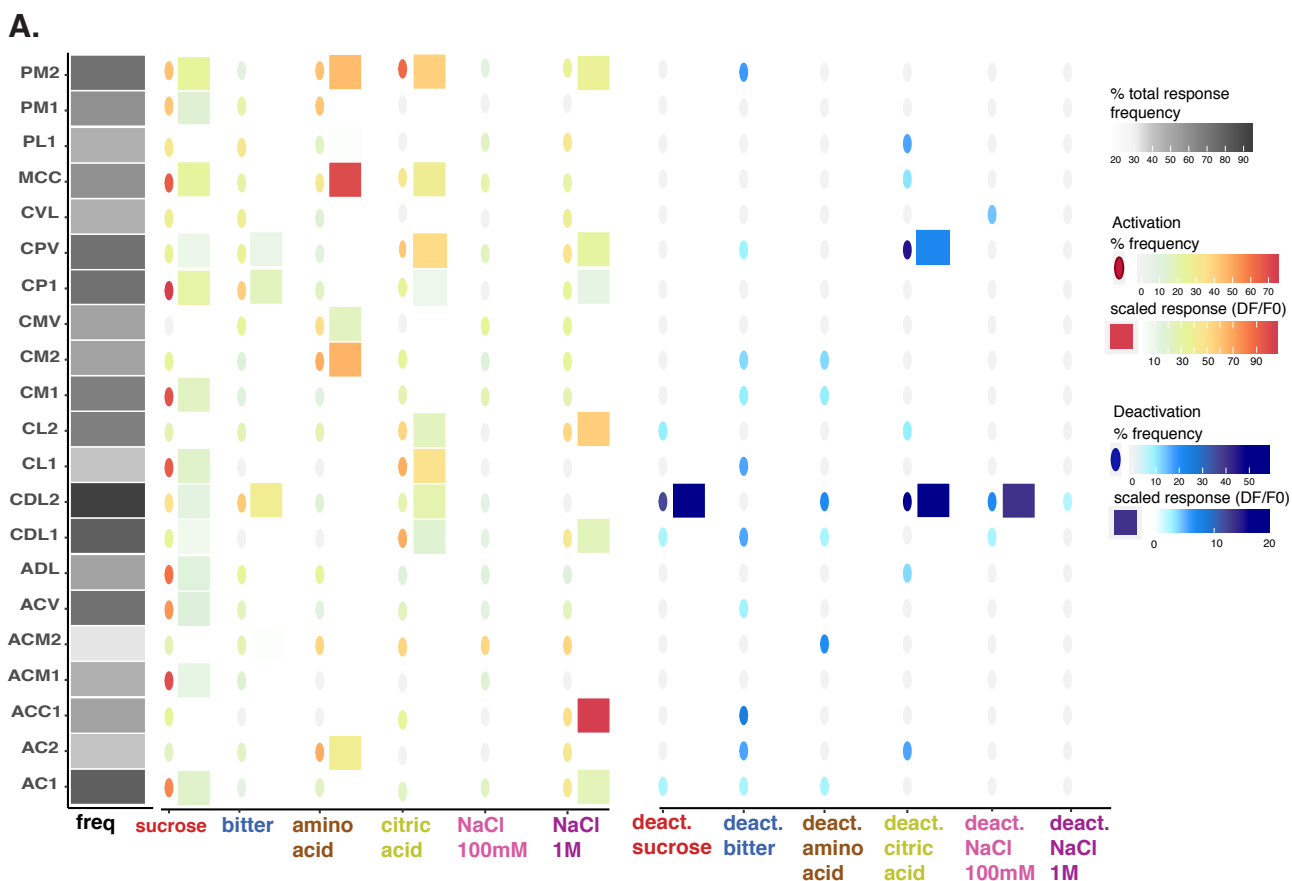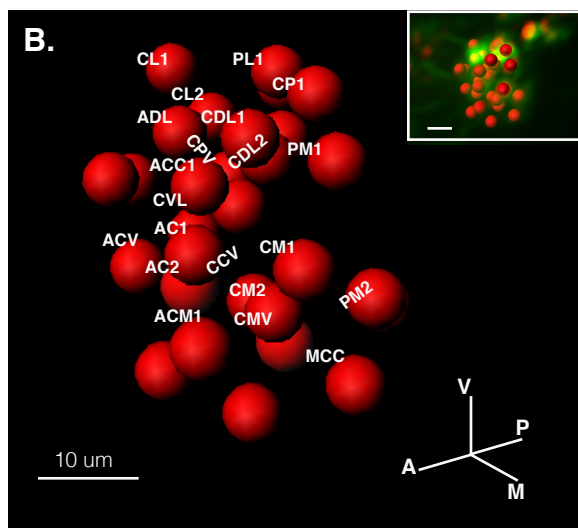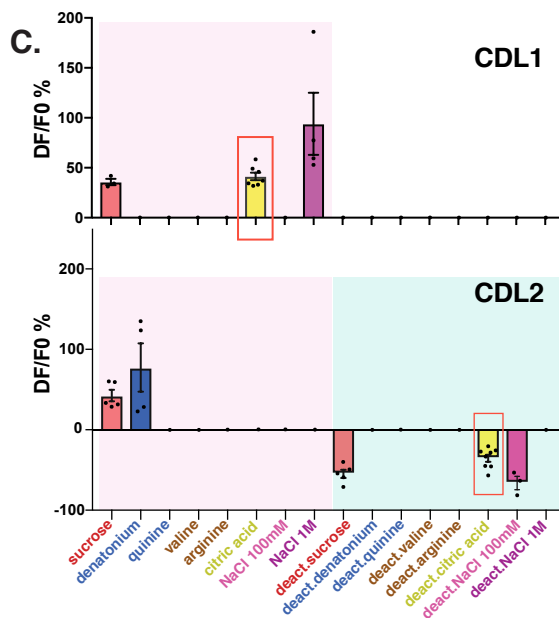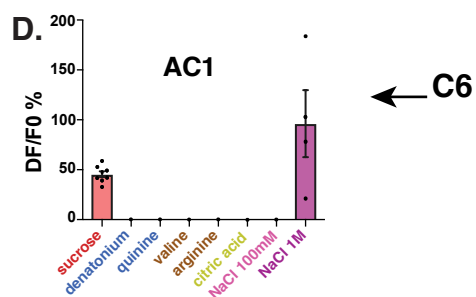



**Figure 5: Single cell RNA sequencing of chemosensory neurons.**

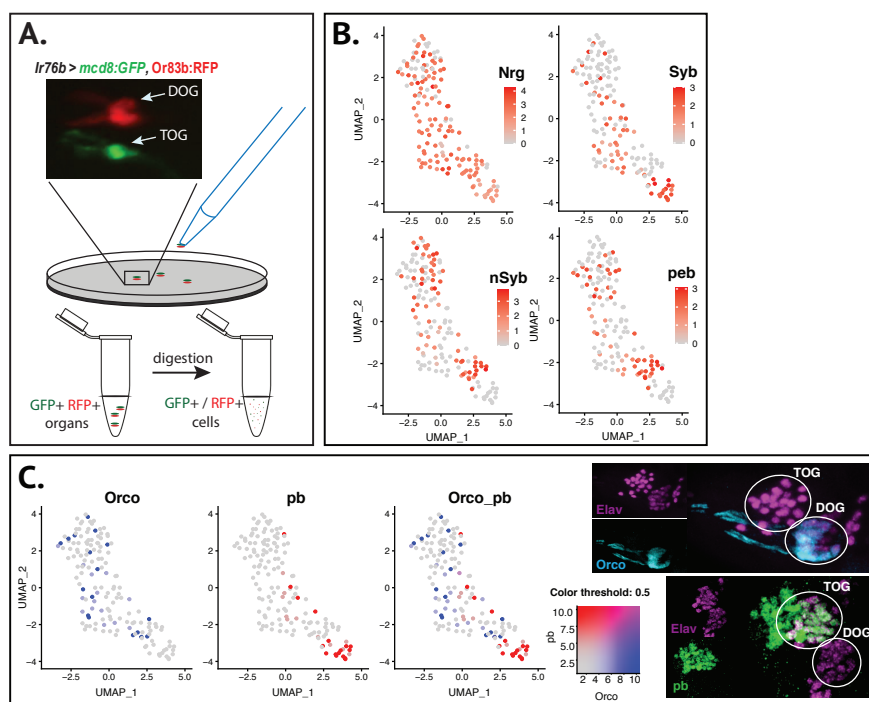

## Supplementary Figure 5: Single cell RNA sequencing of chemosensory neurons.

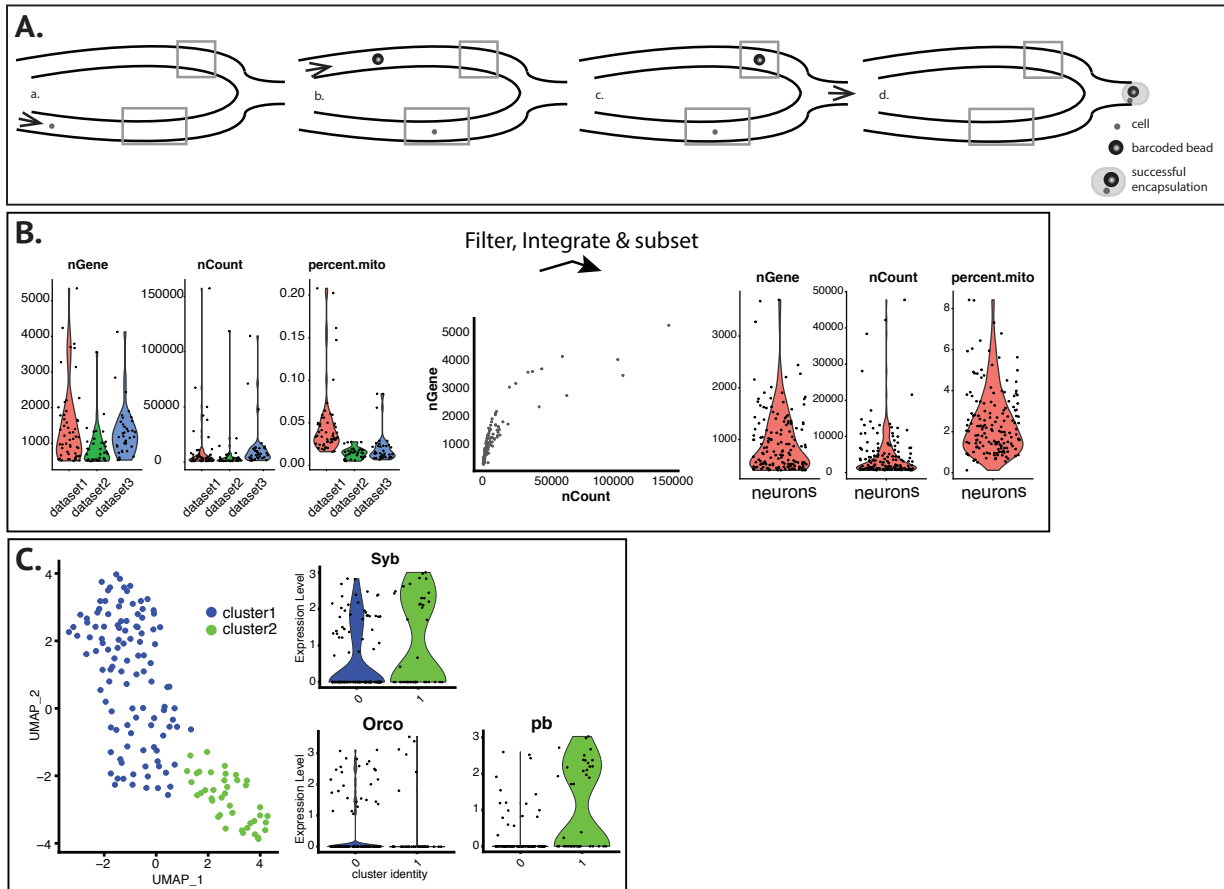

**Figure 6: Neurotransmitters of chemosensory neurons show broad or narrow expression**

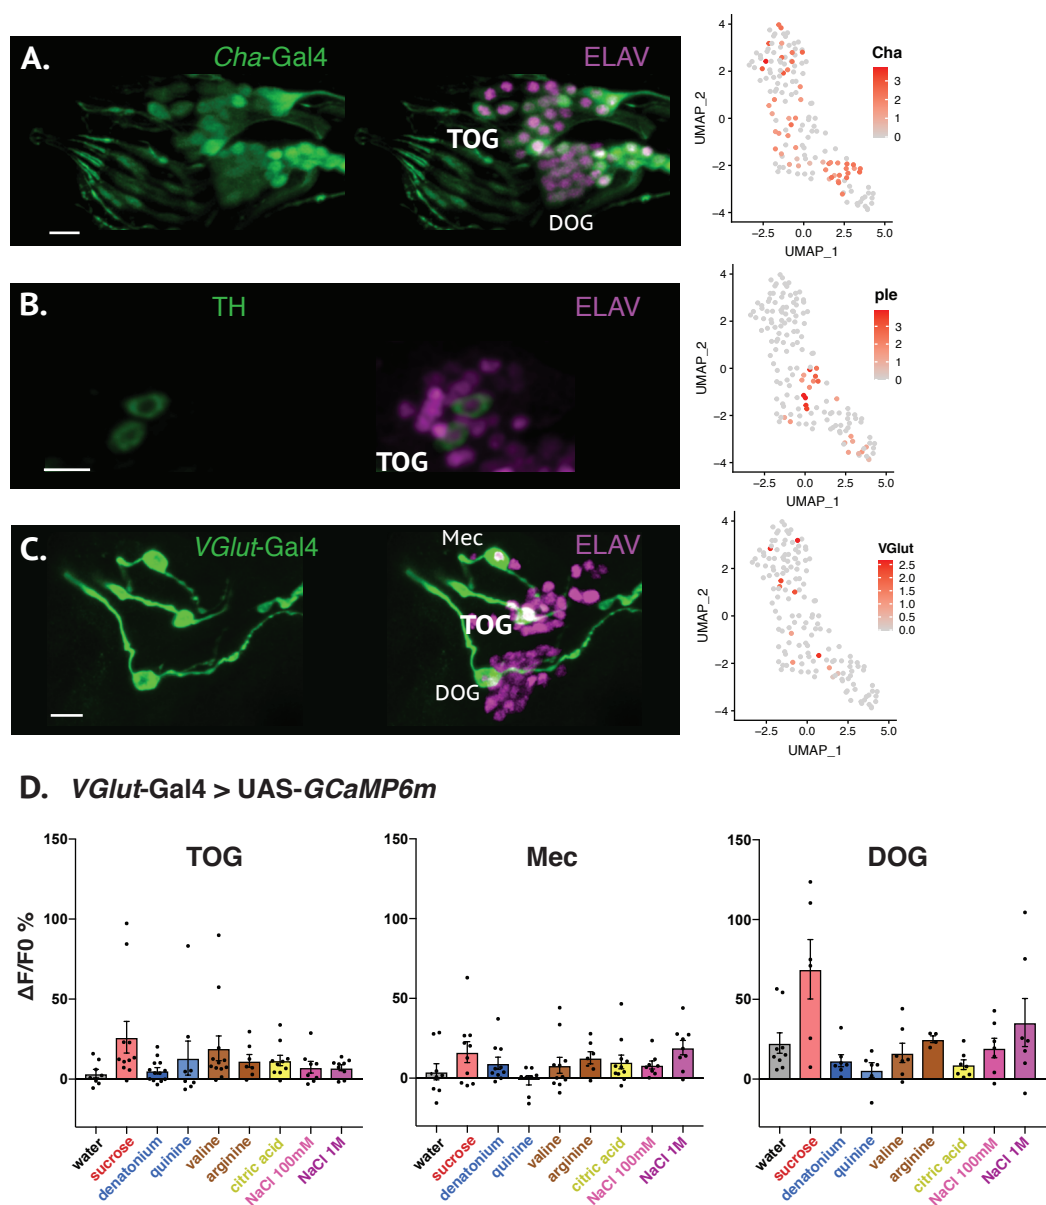

## Supplementary Figure 6: *VGlut*-positive TOG neuron doesn't share identity with C2, C7 or C1 neurons.

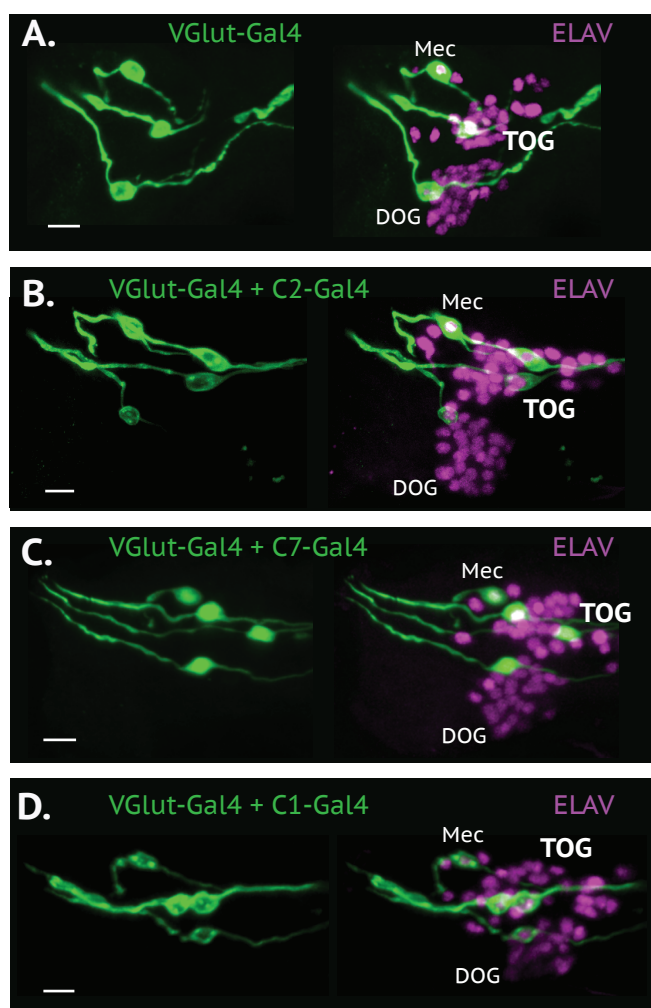

**Figure 7: Co-expression of neurotransmitter marker genes.**

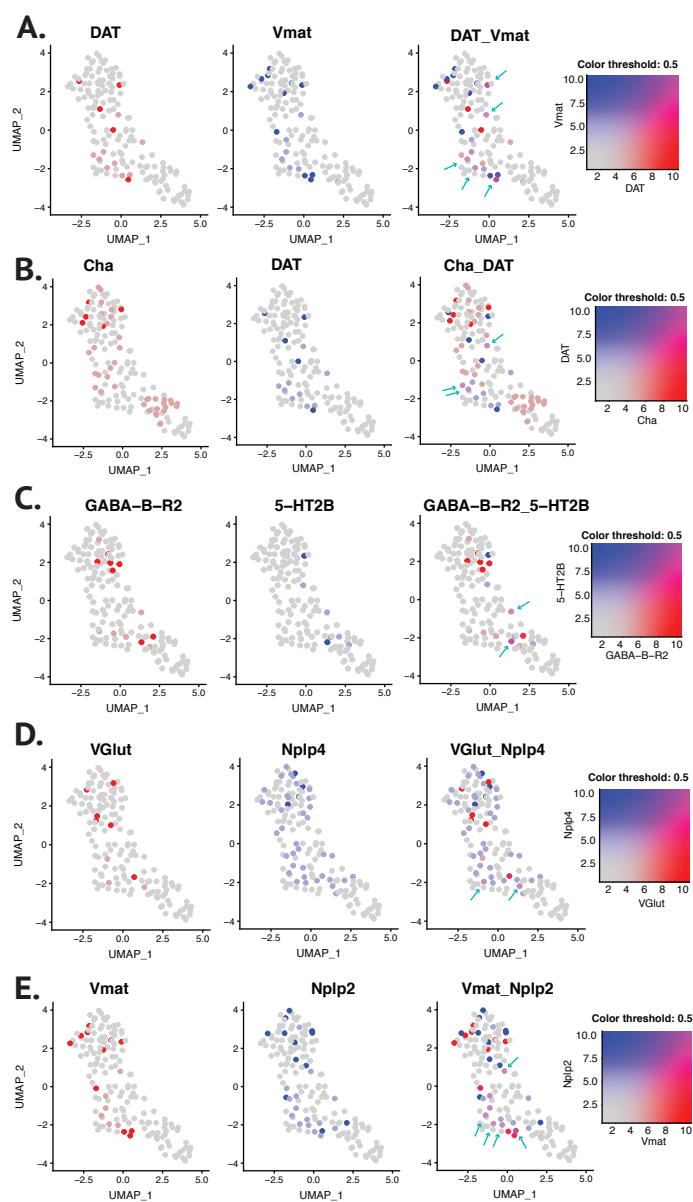

## Figure 8: Chemosensory neurons express mechanosensory markers

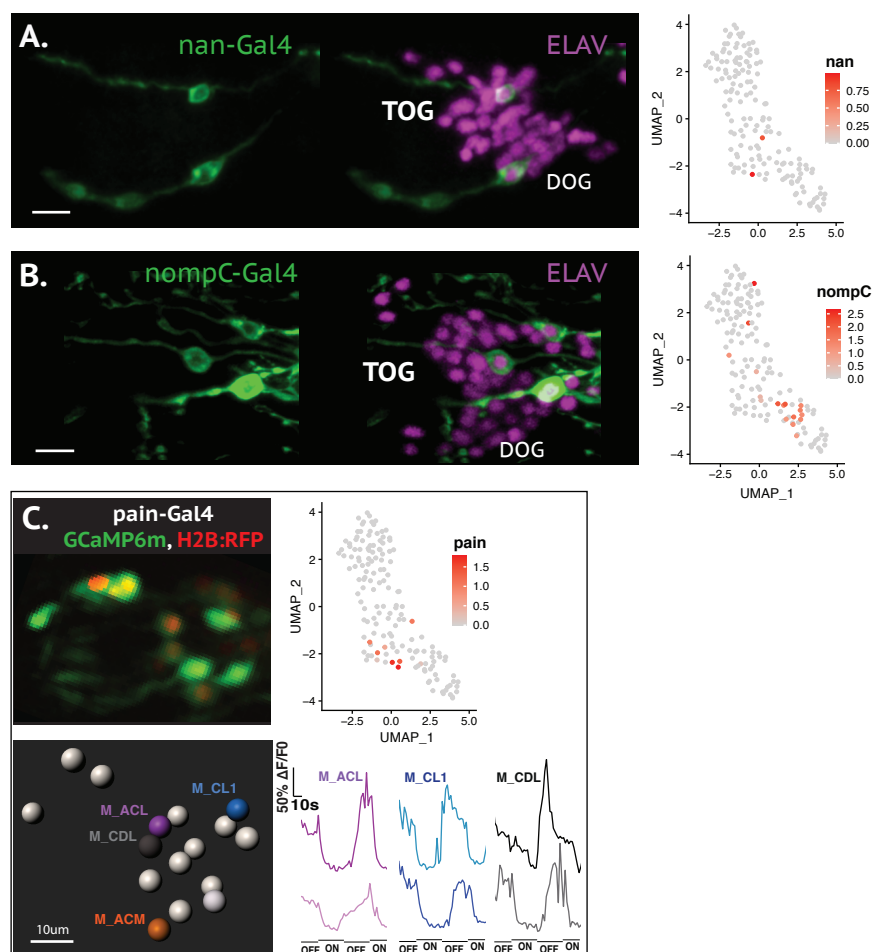

## Supplementary Figure 8: Response to both gustatory and mechanical stimulation in a TOG neuron.

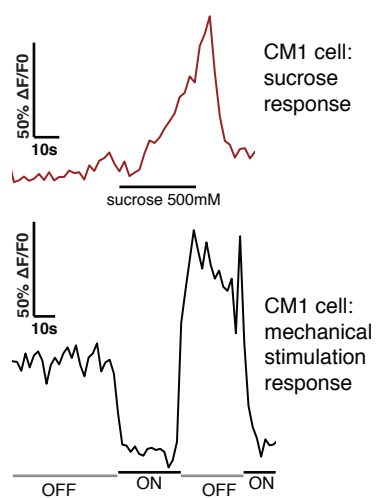

Source: https://www.biorxiv.org/content/10.1101/2020.05.21.109959v1.full.pdf
